# Supplementary material for: Effects of different functional groups on the optical and charge transport properties of copolymers for polymer solar cells
Source: Royal Society of Chemistry journal article supplement (doi:10.1039/c6ra07647e), 2016-01-01
Supplement: c6ra07647e1.pdf [file c6ra07647e1.pdf]

## Effects of different functional groups on the optical and charge transport properties of copolymers for polymer solar cells

### Supplementary Information

#### Content

- Table S1a.** Selected bond lengths and dihedral angles of QTT (n=1-3).
- Table S1b.** Selected bond lengths and dihedral angles of BDT-DTBTBPz (Pz) (n=1-3).
- Table S1c.** Selected bond lengths and dihedral angles of BDT-DTBTQx (Qx) (n=1-3).
- Table S1d.** Selected bond lengths and dihedral angles of D1 (n=1-3).
- Table S1e.** Selected bond lengths and dihedral angles of D2 (n=1-3).
- Table S1f.** Selected bond lengths and dihedral angles of D3 (n=1-3).
- Table S2.** Absorption peaks and oscillator strength of the seven monomers under external electric field.
- Table S3.** HOMO, LUMO energy levels and band gaps of the seven monomers under external electric field (eV).
- Table S4.** Calculated transition energies and oscillator strengths for PC<sub>60</sub>BM/BSeTT.
- Table S5.** Calculated transition energies and oscillator strengths for PC<sub>60</sub>BM/QTT.
- Table S6.** Calculated transition energies and oscillator strengths for PC<sub>60</sub>BM/Pz.
- Table S7.** Calculated transition energies and oscillator strengths for PC<sub>60</sub>BM/Qx.
- Table S8.** Calculated transition energies and oscillator strengths for PC<sub>60</sub>BM/D1.
- Table S9.** Calculated transition energies and oscillator strengths for PC<sub>60</sub>BM/D2.
- Table S10.** Calculated transition energies and oscillator strengths for PC<sub>60</sub>BM/D3.
- Figure S1.** Relationship between the ionization potentials and electron affinities of all oligomers and the reciprocal of conjugated unit (1/n).
- Figure S2.** Charge difference density (CDD) of PC<sub>60</sub>BM/BSeTT, where the green and red stand for the hole and electron, respectively.
- Figure S3.** Charge difference density (CDD) of PC<sub>60</sub>BM/QTT, where the green and red stand for the hole and electron, respectively.
- Figure S4.** Charge difference density (CDD) of PC<sub>60</sub>BM/Pz, where the green and red stand for the hole and electron, respectively.
- Figure S5.** Charge difference density (CDD) of PC<sub>60</sub>BM/Qx, where the green and red stand for the hole and electron, respectively.
- Figure S6.** Charge difference density (CDD) of PC<sub>60</sub>BM/D1, where the green and red stand for the hole and electron, respectively.
- Figure S7.** Charge difference density (CDD) of PC<sub>60</sub>BM/D2, where the green and red stand for the hole and electron, respectively.
- Figure S8.** Charge difference density (CDD) of PC<sub>60</sub>BM/D3, where the green and red stand for the hole and electron, respectively.

**Table S1a.** Selected bond lengths and dihedral angles of QTT (n=1-3).

|                    |     | TT-Q      | Q-TT      | TT-Q      | Q-TT      | TT-Q      | Q-TT      |
|--------------------|-----|-----------|-----------|-----------|-----------|-----------|-----------|
| Bond lengths(Å)    | n=1 | 1.46337   | 1.46358   |           |           |           |           |
|                    | n=2 | 1.46205   | 1.46150   | 1.46144   | 1.46236   |           |           |
|                    | n=3 | 1.46199   | 1.46137   | 1.46086   | 1.46060   | 1.46096   | 1.46293   |
| Dihedral angles(°) | n=1 | -23.63928 | -26.15308 |           |           |           |           |
|                    | n=2 | -24.90429 | -17.87959 | -17.42984 | -21.26147 |           |           |
|                    | n=3 | -24.87192 | -16.90961 | -16.16270 | -19.36750 | -19.18454 | -16.66149 |

**Table S1b.** Selected bond lengths and dihedral angles of BDT-DTBTBPz (Pz) (n=1-3).

|                    |     | BDT-T      | T-PZ     | PZ-T     | T-BDT      | BDT-T      | T-PZ    | PZ-T     | T-BDT      | BDT-T      | T-PZ    | PZ-T     |
|--------------------|-----|------------|----------|----------|------------|------------|---------|----------|------------|------------|---------|----------|
| Bond lengths(Å)    | n=1 | 1.44559    | 1.44987  | 1.45509  |            |            |         |          |            |            |         |          |
|                    | n=2 | 1.44514    | 1.44811  | 1.44724  | 1.44326    | 1.44540    | 1.44968 | 1.45493  |            |            |         |          |
|                    | n=3 | 1.44431    | 1.44742  | 1.44719  | 1.44261    | 1.44431    | 1.44862 | 1.44793  | 1.44448    | 1.44358    | 1.44901 | 1.45484  |
| Dihedral angles(°) | n=1 | -170.49803 | 5.61816  | 13.39008 |            |            |         |          |            |            |         |          |
|                    | n=2 | 170.71515  | -5.03109 | -5.48157 | -173.56378 | -158.08324 | 7.68750 | 11.70502 |            |            |         |          |
|                    | n=3 | 176.68680  | 3.44255  | 2.72084  | -179.08794 | 158.05137  | 0.36958 | 8.30794  | -160.10313 | -175.84670 | 4.05776 | 12.77740 |

**Table S1c.** Selected bond lengths and dihedral angles of BDT-DTBTQ<sub>x</sub> (Q<sub>x</sub>) (n=1-3).

|                    |     | BDT-T      | T-QX     | QX-T     | T-BDT      | BDT-T     | T-QX     | QX-T     | T-BDT      | BDT-T      | T-QX     | QX-T      |
|--------------------|-----|------------|----------|----------|------------|-----------|----------|----------|------------|------------|----------|-----------|
| Bond lengths(Å)    | n=1 | 1.44394    | 1.45271  | 1.45600  |            |           |          |          |            |            |          |           |
|                    | n=2 | 1.44380    | 1.45190  | 1.45019  | 1.44136    | 1.44090   | 1.45047  | 1.45596  |            |            |          |           |
|                    | n=3 | 1.44225    | 1.45033  | 1.45051  | 1.44179    | 1.44062   | 1.44914  | 1.44890  | 1.44057    | 1.44108    | 1.45052  | 1.45661   |
| Dihedral angles(°) | n=1 | -158.88276 | 4.50387  | 15.11273 |            |           |          |          |            |            |          |           |
|                    | n=2 | -158.64403 | 5.64618  | 4.28348  | -164.62392 | 170.31989 | 2.72739  | 9.13454  |            |            |          |           |
|                    | n=3 | -174.88722 | -4.84456 | 6.84659  | -161.24158 | 178.96522 | -3.00885 | -3.68527 | -179.89621 | -173.25962 | -2.86104 | -11.93687 |

**Table S1d.** Selected bond lengths and dihedral angles of D1 (n=1-3).

|                    |     | TT-QF     | QF-TT     | TT-QF     | QF-TT     | TT-QF    | QF-TT     |
|--------------------|-----|-----------|-----------|-----------|-----------|----------|-----------|
| Bond lengths(Å)    | n=1 | 1.46414   | 1.46163   |           |           |          |           |
|                    | n=2 | 1.46027   | 1.45967   | 1.46246   | 1.46310   |          |           |
|                    | n=3 | 1.46317   | 1.46244   | 1.45958   | 1.46229   | 1.46225  | 1.46340   |
| Dihedral angles(°) | n=1 | 17.47226  | -31.20169 |           |           |          |           |
|                    | n=2 | 25.65795  | 29.42143  | -19.99886 | -15.77639 |          |           |
|                    | n=3 | -16.00495 | -19.90711 | 31.36639  | -15.42108 | -        | -19.76523 |
|                    |     |           |           |           |           | 15.11001 |           |

**Table S1e.** Selected bond lengths and dihedral angles of D2 (n=1-3).

|                    |     | TT-QX     | QX-TT    | TT-QX     | QX-TT    | TT-QX     | QX-TT     |
|--------------------|-----|-----------|----------|-----------|----------|-----------|-----------|
| Bond lengths(Å)    | n=1 | 1.45686   | 1.45632  |           |          |           |           |
|                    | n=2 | 1.45004   | 1.44666  | 1.45194   | 1.45520  |           |           |
|                    | n=3 | 1.44964   | 1.45078  | 1.44356   | 1.44464  | 1.45106   | 1.45513   |
| Dihedral angles(°) | n=1 | 16.93201  | 11.11547 |           |          |           |           |
|                    | n=2 | 21.65745  | 23.27112 | -14.39769 | -        |           |           |
|                    | n=3 | -24.94180 | 10.39440 | 18.35110  | 20.95335 | -14.28154 | -10.38900 |
|                    |     |           |          |           | 11.02407 |           |           |

**Table S1f.** Selected bond lengths and dihedral angles of D3 (n=1-3).

|                    |     | TT-PX     | PX-TT     | TT-PX     | PX-TT     | TT-PX    | PX-TT    |
|--------------------|-----|-----------|-----------|-----------|-----------|----------|----------|
| Bond lengths(Å)    | n=1 | 1.47221   | 1.47351   |           |           |          |          |
|                    | n=2 | 1.47214   | 1.47429   | 1.47374   | 1.47298   |          |          |
|                    | n=3 | 1.47223   | 1.47172   | 1.48291   | 1.48047   | 1.47269  | 1.47235  |
| Dihedral angles(°) | n=1 | -50.19274 | -52.90048 |           |           |          |          |
|                    | n=2 | -49.56691 | -56.94529 | -56.13512 | -46.95250 |          |          |
|                    | n=3 | -50.58099 | -50.67054 | 111.1909  | 58.33356  | 49.10815 | 41.56013 |
|                    |     |           |           |           |           |          | 3        |

**Table S2.** Absorption peaks and oscillator strength of the seven monomers under external electric field.

| Field ( $\times 10^{-3}$ a.u.) | BSeTT          | QTT            | Pz             | Qx             | D1             | D2             | D3             |
|--------------------------------|----------------|----------------|----------------|----------------|----------------|----------------|----------------|
| 0                              | 498.34(0.6012) | 409.66(0.6229) | 740.50(0.4990) | 641.87(0.5056) | 400.44(0.6706) | 660.97(0.4478) | 397.08(0.2421) |
| 1                              | 500.49(0.6031) | 412.27(0.6246) | 774.32(0.5147) | 661.59(0.5253) | 405.07(0.6613) | 662.28(0.4472) | 400.44(0.2481) |
| 2                              | —              | 418.90(0.6267) | 817.75(0.5436) | —              | 414.01(0.6575) | 668.81(0.4514) | 406.55(0.2530) |
| 3                              | —              | 429.22(0.6319) | 875.33(0.5836) | —              | —              | 678.96(0.4554) | 415.67(0.2580) |

**Table S3.** HOMO, LUMO energy levels and band gaps of the seven monomers under external electric field (eV).

| Field ( $\times 10^{-3}$ a.u.) | BSeTT |       |                | QTT   |       |                | Pz    |       |                | Qx    |       |                | D1    |       |                | D2    |       |                | D3    |       |                |
|--------------------------------|-------|-------|----------------|-------|-------|----------------|-------|-------|----------------|-------|-------|----------------|-------|-------|----------------|-------|-------|----------------|-------|-------|----------------|
|                                | H     | L     | $\Delta_{H-L}$ |
| 0                              | -5.15 | -2.79 | 2.36           | -5.16 | -2.30 | 2.86           | -4.78 | -3.28 | 1.50           | -4.89 | -3.08 | 1.81           | -5.25 | -2.33 | 2.92           | -4.88 | -3.13 | 1.75           | -5.26 | -2.25 | 3.01           |
| 1                              | -5.14 | -2.79 | 2.35           | -5.14 | -2.30 | 2.84           | -4.76 | -3.37 | 1.39           | -4.86 | -3.16 | 1.70           | -5.21 | -2.33 | 2.88           | -4.88 | -3.13 | 1.75           | -5.21 | -2.26 | 2.95           |
| 2                              | —     | —     | —              | -5.08 | -2.31 | 2.77           | -4.70 | -3.44 | 1.26           | —     | —     | —              | -5.13 | -2.34 | 2.79           | -4.86 | -3.13 | 1.73           | -5.13 | -2.27 | 2.86           |
| 3                              | —     | —     | —              | -5.00 | -2.32 | 2.68           | -4.63 | -3.49 | 1.14           | —     | —     | —              | —     | —     | —              | -4.82 | -3.11 | 1.71           | -5.04 | -2.29 | 2.75           |

**Table S4.** Calculated transition energies and oscillator strengths for PC<sub>60</sub>BM/BSeTT.

| State | $E$ (eV) | Absorption peak $\lambda$ (nm) | Contribution MO  | Strength $f$ |
|-------|----------|--------------------------------|------------------|--------------|
| S1    | 2.4227   | 511.77                         | (0.67058)H-1→L   | 0.0013       |
| S2    | 2.4562   | 504.79                         | (0.61842)H-1→L+1 | 0.0000       |
| S3    | 2.5071   | 494.54                         | (0.68093)H→L+3   | 0.5180       |
| S4    | 2.5273   | 490.58                         | (0.65414)H-2→L   | 0.0001       |
| S5    | 2.5499   | 486.24                         | (0.64220)H-3→L   | 0.0018       |
| S6    | 2.6818   | 462.31                         | (0.49227)H-4→L+1 | 0.0002       |
| S7    | 2.7249   | 455.00                         | (0.50300)H-2→L+1 | 0.0007       |
| S8    | 2.7865   | 444.94                         | (0.49832)H-4→L   | 0.0001       |
| S9    | 2.8377   | 436.91                         | (0.43935)H-3→L+1 | 0.0002       |
| S10   | 2.8683   | 432.26                         | (0.54433)H-5→L+1 | 0.0009       |
| S11   | 2.9556   | 419.49                         | (0.56464)H-4→L+2 | 0.0020       |
| S12   | 2.9866   | 415.14                         | (0.53492)H-1→L+2 | 0.0023       |
| S13   | 3.0021   | 412.99                         | (0.50347)H-2→L+2 | 0.0001       |
| S14   | 3.0648   | 404.54                         | (0.59659)H→L     | 0.0052       |
| S15   | 3.0869   | 401.65                         | (0.63059)H-5→L   | 0.0003       |
| S16   | 3.1225   | 397.07                         | (0.59383)H→L+1   | 0.0070       |
| S17   | 3.1457   | 394.14                         | (0.51284)H-3→L+2 | 0.0030       |
| S18   | 3.1770   | 390.26                         | (0.62641)H-5→L+2 | 0.0110       |
| S19   | 3.3012   | 375.57                         | (0.67971)H→L+2   | 0.0001       |
| S20   | 3.4585   | 358.49                         | (0.38654)H-9→L   | 0.0024       |
| S21   | 3.5132   | 352.91                         | (0.46798)H-9→L+1 | 0.0000       |

---

|     |        |        |                  |        |
|-----|--------|--------|------------------|--------|
| S22 | 3.5371 | 350.53 | (0.29889)H-4→L+4 | 0.0005 |
| S23 | 3.6941 | 335.62 | (0.28040)H-6→L+3 | 0.0159 |
| S24 | 3.6962 | 335.44 | (0.52439)H-6→L+3 | 0.0473 |
| S25 | 3.7108 | 334.11 | (0.27965)H-3→L+5 | 0.0006 |
| S26 | 3.7202 | 333.28 | (0.39877)H-1→L+4 | 0.0082 |
| S27 | 3.7771 | 328.25 | (0.34068)H-3→L+4 | 0.0008 |
| S28 | 3.7873 | 327.37 | (0.39072)H-15→L  | 0.0001 |
| S29 | 3.8485 | 322.16 | (0.29794)H-18→L  | 0.0057 |
| S30 | 3.8681 | 320.53 | (0.62019)H-1→L+3 | 0.0027 |

---



**Table S5.** Calculated transition energies and oscillator strengths for PC<sub>60</sub>BM/QTT.

| State | $E$ (eV) | Absorption peak $\lambda$ (nm) | Contribution MO                 | Strength $f$ |
|-------|----------|--------------------------------|---------------------------------|--------------|
| S1    | 2.4276   | 510.72                         | (0.66917)H-1 $\rightarrow$ L    | 0.0015       |
| S2    | 2.4522   | 505.60                         | (0.61556)H-1 $\rightarrow$ L+1  | 0.0000       |
| S3    | 2.5278   | 490.48                         | (0.67082)H-2 $\rightarrow$ L    | 0.0000       |
| S4    | 2.5517   | 485.90                         | (0.65369)H-3 $\rightarrow$ L    | 0.0000       |
| S5    | 2.6697   | 464.42                         | (0.49995)H-3 $\rightarrow$ L+1  | 0.0002       |
| S6    | 2.7205   | 455.73                         | (0.53756)H-2 $\rightarrow$ L+1  | 0.0004       |
| S7    | 2.7854   | 445.13                         | (0.44604)H-5 $\rightarrow$ L    | 0.0001       |
| S8    | 2.8351   | 437.32                         | (0.43602)H-3 $\rightarrow$ L+1  | 0.0002       |
| S9    | 2.8679   | 432.32                         | (0.53764)H-6 $\rightarrow$ L+1  | 0.0007       |
| S10   | 2.9534   | 419.81                         | (0.52560)H-5 $\rightarrow$ L+2  | 0.0013       |
| S11   | 2.9800   | 416.05                         | (0.54803)H-1 $\rightarrow$ L+2  | 0.0143       |
| S12   | 2.9992   | 413.39                         | (0.50802)H-2 $\rightarrow$ L+2  | 0.0171       |
| S13   | 3.0220   | 410.28                         | (0.66053)H $\rightarrow$ L+3    | 0.4922       |
| S14   | 3.0973   | 400.29                         | (0.63329)H-6 $\rightarrow$ L    | 0.0046       |
| S15   | 3.1389   | 394.99                         | (0.54866)H-3 $\rightarrow$ L+2  | 0.0040       |
| S16   | 3.1509   | 393.49                         | (0.60800)H $\rightarrow$ L      | 0.0027       |
| S17   | 3.1788   | 390.04                         | (0.63202)H-6 $\rightarrow$ L+2  | 0.0124       |
| S18   | 3.2493   | 381.57                         | (0.61902)H $\rightarrow$ L+1    | 0.0000       |
| S19   | 3.3945   | 365.26                         | (0.68315)H $\rightarrow$ L+2    | 0.0021       |
| S20   | 3.4601   | 358.33                         | (0.34988)H-12 $\rightarrow$ L   | 0.0010       |
| S21   | 3.5128   | 352.95                         | (0.44232)H-12 $\rightarrow$ L+1 | 0.0001       |
| S22   | 3.5361   | 350.62                         | (0.29489)H-1 $\rightarrow$ L+6  | 0.0012       |
| S23   | 3.6053   | 343.89                         | (0.56140)H-4 $\rightarrow$ L+3  | 0.2245       |
| S24   | 3.6958   | 335.47                         | (0.40801)H-20 $\rightarrow$ L   | 0.0012       |
| S25   | 3.7108   | 334.12                         | (0.38112)H-21 $\rightarrow$ L   | 0.0000       |
| S26   | 3.7176   | 333.51                         | (0.45725)H-1 $\rightarrow$ L+4  | 0.0118       |
| S27   | 3.7234   | 332.99                         | (0.38586)H-17 $\rightarrow$ L+3 | 0.0353       |
| S28   | 3.7793   | 328.06                         | (0.34392)H-3 $\rightarrow$ L+4  | 0.0020       |
| S29   | 3.7875   | 327.35                         | (0.40878)H-19 $\rightarrow$ L   | 0.0000       |
| S30   | 3.8141   | 325.07                         | (0.54274)H-4 $\rightarrow$ L+1  | 0.0005       |

**Table S6.** Calculated transition energies and oscillator strengths for PC<sub>60</sub>BM/Pz.

| State | $E$ (eV) | Absorption peak $\lambda$ (nm) | Contribution MO  | Strength $f$ |
|-------|----------|--------------------------------|------------------|--------------|
| S1    | 1.6909   | 733.24                         | (0.68362)H→L     | 0.4166       |
| S2    | 2.4210   | 512.12                         | (0.66791)H→L     | 0.0023       |
| S3    | 2.4502   | 506.01                         | (0.61328)H-2→L+2 | 0.0000       |
| S4    | 2.5271   | 490.62                         | (0.62097)H-3→L+1 | 0.0000       |
| S5    | 2.5459   | 487.00                         | (0.61741)H-4→L+1 | 0.0000       |
| S6    | 2.6562   | 466.77                         | (0.67460)H→L+1   | 0.0000       |
| S7    | 2.6713   | 464.13                         | (0.47402)H-5→L+2 | 0.0001       |
| S8    | 2.6963   | 459.83                         | (0.60865)H→L+2   | 0.0035       |
| S9    | 2.7146   | 456.72                         | (0.50903)H-1→L   | 0.0263       |
| S10   | 2.7224   | 455.41                         | (0.43038)H-3→L+2 | 0.0003       |
| S11   | 2.7829   | 445.52                         | (0.50026)H-5→L+1 | 0.0002       |
| S12   | 2.8307   | 438.00                         | (0.42184)H-5→L+2 | 0.0000       |
| S13   | 2.8601   | 433.50                         | (0.54228)H-7→L+2 | 0.0008       |
| S14   | 2.9348   | 422.47                         | (0.66114)H→L+3   | 0.0016       |
| S15   | 2.9470   | 420.72                         | (0.54355)H-5→L+3 | 0.0013       |
| S16   | 2.9823   | 415.73                         | (0.46893)H-2→L+3 | 0.0002       |
| S17   | 2.9865   | 415.15                         | (0.41221)H-17→L  | 0.0071       |
| S18   | 3.0008   | 413.18                         | (0.45733)H-3→L+3 | 0.0002       |
| S19   | 3.0827   | 402.19                         | (0.62888)H-7→L+1 | 0.0009       |
| S20   | 3.1345   | 395.55                         | (0.37217)H-4→L+3 | 0.0674       |
| S21   | 3.1495   | 393.67                         | (0.28425)H-8→L   | 0.1368       |
| S22   | 3.1686   | 391.29                         | (0.62468)H-7→L+3 | 0.0127       |
| S23   | 3.2336   | 383.43                         | (0.54468)H-8→L   | 0.0104       |
| S24   | 3.2364   | 383.09                         | (0.67521)H-2→L   | 0.0049       |
| S25   | 3.3505   | 370.05                         | (0.60470)H-3→L   | 0.0047       |
| S26   | 3.3973   | 364.95                         | (0.50391)H→L+6   | 0.3122       |
| S27   | 3.4160   | 362.95                         | (0.60492)H-5→L   | 0.0010       |
| S28   | 3.4227   | 362.24                         | (0.44578)H→L+8   | 0.1253       |
| S29   | 3.4349   | 360.95                         | (0.35148)H-10→L  | 0.1349       |
| S30   | 3.4354   | 360.90                         | (0.63613)H-1→L+1 | 0.0438       |

**Table S7.** Calculated transition energies and oscillator strengths for PC<sub>60</sub>BM/Qx.

| State | $E$ (eV) | Absorption peak $\lambda$ (nm) | Contribution MO   | Strength $f$ |
|-------|----------|--------------------------------|-------------------|--------------|
| S1    | 1.8991   | 652.87                         | (0.68631)H→L      | 0.4554       |
| S2    | 2.4223   | 511.85                         | (0.66372)H-3→L+1  | 0.0021       |
| S3    | 2.4528   | 505.48                         | (0.61209)H-3→L+2  | 0.0000       |
| S4    | 2.5260   | 490.83                         | (0.65731)H-4→L+1  | 0.0000       |
| S5    | 2.5458   | 487.01                         | (0.64315)H-5→L+1  | 0.0000       |
| S6    | 2.6748   | 463.54                         | (0.48495)H-6→L+2  | 0.0001       |
| S7    | 2.7220   | 455.49                         | (0.51530)H-4→L+2  | 0.0030       |
| S8    | 2.7312   | 453.95                         | (0.55413)H-1→L    | 0.2273       |
| S9    | 2.7599   | 449.23                         | (0.52843)H→L+1    | 0.0006       |
| S10   | 2.7751   | 446.77                         | (0.49210)H→L+2    | 0.0020       |
| S11   | 2.8044   | 442.10                         | (0.39356)H→L+1    | 0.0012       |
| S12   | 2.8429   | 436.11                         | (0.41046)H-6→L+2  | 0.0001       |
| S13   | 2.8640   | 432.91                         | (0.52521)H-7→L+2  | 0.0007       |
| S14   | 2.9370   | 422.15                         | (0.46096)H-6→L+3  | 0.0006       |
| S15   | 2.9854   | 415.30                         | (0.46751)H-3→L+3  | 0.0008       |
| S16   | 3.0016   | 413.06                         | (0.44920)H-4→L+3  | 0.0004       |
| S17   | 3.0050   | 412.59                         | (0.50546)H→L+3    | 0.0012       |
| S18   | 3.0848   | 401.92                         | (0.35993)H-2→L    | 0.0968       |
| S19   | 3.0890   | 401.37                         | (0.57793)H-7→L+1  | 0.0139       |
| S20   | 3.1390   | 394.98                         | (0.32658)H-5→L+3  | 0.0341       |
| S21   | 3.1462   | 394.08                         | (0.41911)H-5→L+3  | 0.0360       |
| S22   | 3.1761   | 390.36                         | (0.63300)H-7→L+3  | 0.0098       |
| S23   | 3.3750   | 367.36                         | (0.67524)H-3→L    | 0.0047       |
| S24   | 3.4467   | 359.72                         | (0.45254)H-1→L+1  | 0.0010       |
| S25   | 3.4571   | 358.64                         | (0.36540)H-12→L+1 | 0.0021       |
| S26   | 3.4730   | 357.00                         | (0.38830)H-5→L    | 0.0443       |
| S27   | 3.4891   | 355.34                         | (0.45466)H-5→L    | 0.0575       |
| S28   | 3.4999   | 354.25                         | (0.33247)H-1→L+2  | 0.0041       |
| S29   | 3.5119   | 353.04                         | (0.50956)H→L+6    | 0.5663       |
| S30   | 3.5137   | 352.86                         | (0.33891)H-12→L+2 | 0.0032       |

**Table S8.** Calculated transition energies and oscillator strengths for PC<sub>60</sub>BM/D1.

| State | $E$ (eV) | Absorption peak $\lambda$ (nm) | Contribution MO                 | Strength $f$ |
|-------|----------|--------------------------------|---------------------------------|--------------|
| S1    | 2.4278   | 510.69                         | (0.66893)H-1 $\rightarrow$ L    | 0.0016       |
| S2    | 2.4543   | 505.17                         | (0.61561)H-1 $\rightarrow$ L+1  | 0.0000       |
| S3    | 2.5280   | 490.45                         | (0.60178)H-3 $\rightarrow$ L    | 0.0000       |
| S4    | 2.5507   | 486.08                         | (0.63809)H-4 $\rightarrow$ L    | 0.0000       |
| S5    | 2.6728   | 463.88                         | (0.48294)H-4 $\rightarrow$ L+1  | 0.0002       |
| S6    | 2.7218   | 455.52                         | (0.47791)H-3 $\rightarrow$ L+1  | 0.0005       |
| S7    | 2.7835   | 445.42                         | (0.48951)H-5 $\rightarrow$ L    | 0.0000       |
| S8    | 2.8360   | 437.19                         | (0.44387)H-5 $\rightarrow$ L+1  | 0.0001       |
| S9    | 2.8674   | 432.39                         | (0.52308)H-6 $\rightarrow$ L+1  | 0.0007       |
| S10   | 2.9470   | 420.71                         | (0.55920)H-5 $\rightarrow$ L+2  | 0.0010       |
| S11   | 2.9822   | 415.74                         | (0.52944)H-1 $\rightarrow$ L+2  | 0.0028       |
| S12   | 2.9992   | 413.39                         | (0.45950)H-3 $\rightarrow$ L+2  | 0.0000       |
| S13   | 3.0822   | 402.26                         | (0.55899)H $\rightarrow$ L+3    | 0.3940       |
| S14   | 3.1010   | 399.82                         | (0.52782)H-6 $\rightarrow$ L    | 0.1592       |
| S15   | 3.1402   | 394.83                         | (0.52044)H-4 $\rightarrow$ L+2  | 0.0326       |
| S16   | 3.1742   | 390.60                         | (0.62955)H-6 $\rightarrow$ L+2  | 0.0069       |
| S17   | 3.2938   | 376.41                         | (0.56767)H $\rightarrow$ L      | 0.0039       |
| S18   | 3.3566   | 369.37                         | (0.56651)H $\rightarrow$ L+1    | 0.0011       |
| S19   | 3.4600   | 358.33                         | (0.37601)H-12 $\rightarrow$ L   | 0.0001       |
| S20   | 3.5012   | 354.12                         | (0.51979)H-2 $\rightarrow$ L+3  | 0.2251       |
| S21   | 3.5127   | 352.96                         | (0.47741)H-12 $\rightarrow$ L+1 | 0.0016       |
| S22   | 3.5203   | 352.20                         | (0.63405)H $\rightarrow$ L+2    | 0.0308       |
| S23   | 3.5360   | 350.64                         | (0.29359)H-1 $\rightarrow$ L+6  | 0.0030       |
| S24   | 3.6955   | 335.50                         | (0.38621)H-9 $\rightarrow$ L    | 0.0014       |
| S25   | 3.7050   | 334.64                         | (0.52496)H-2 $\rightarrow$ L+1  | 0.0009       |
| S26   | 3.7107   | 334.13                         | (0.38286)H-10 $\rightarrow$ L   | 0.0001       |
| S27   | 3.7190   | 333.38                         | (0.46486)H-1 $\rightarrow$ L+4  | 0.0077       |
| S28   | 3.7376   | 331.72                         | (0.53770)H-2 $\rightarrow$ L    | 0.0012       |
| S29   | 3.7786   | 328.13                         | (0.33746)H-4 $\rightarrow$ L+4  | 0.0035       |
| S30   | 3.7870   | 327.39                         | (0.40462)H-8 $\rightarrow$ L    | 0.0001       |

**Table S9.** Calculated transition energies and oscillator strengths for PC<sub>60</sub>BM/D2.

| State | $E$ (eV) | Absorption peak $\lambda$ (nm) | Contribution MO   | Strength $f$ |
|-------|----------|--------------------------------|-------------------|--------------|
| S1    | 1.8644   | 665.03                         | (0.69552)H→L      | 0.3754       |
| S2    | 2.4257   | 511.13                         | (0.66534)H-1→L+1  | 0.0018       |
| S3    | 2.4516   | 505.73                         | (0.61713)H-1→L+2  | 0.0000       |
| S4    | 2.5244   | 491.13                         | (0.63272)H-3→L+1  | 0.0001       |
| S5    | 2.5490   | 486.40                         | (0.61280)H-4→L+1  | 0.0000       |
| S6    | 2.6173   | 473.70                         | (0.48609)H→L+1    | 0.0035       |
| S7    | 2.6696   | 464.43                         | (0.44609)H-5→L+2  | 0.0001       |
| S8    | 2.7012   | 458.99                         | (0.43590)H→L+2    | 0.0011       |
| S9    | 2.7229   | 455.33                         | (0.44368)H-3→L+2  | 0.0002       |
| S10   | 2.7816   | 445.73                         | (0.47111)H-5→L+1  | 0.0000       |
| S11   | 2.8233   | 439.15                         | (0.52870)H→L+3    | 0.0048       |
| S12   | 2.8303   | 438.06                         | (0.53809)H-2→L    | 0.1579       |
| S13   | 2.8361   | 437.16                         | (0.33659)H-2→L    | 0.0567       |
| S14   | 2.8637   | 432.95                         | (0.52260)H-6→L+2  | 0.0036       |
| S15   | 2.9477   | 420.61                         | (0.56915)H-5→L+3  | 0.0014       |
| S16   | 2.9778   | 416.35                         | (0.54472)H-1→L+3  | 0.0010       |
| S17   | 2.9969   | 413.70                         | (0.48028)H-3→L+3  | 0.0001       |
| S18   | 3.0722   | 403.57                         | (0.39918)H-17→L   | 0.0070       |
| S19   | 3.0907   | 401.15                         | (0.61285)H-6→L+1  | 0.0000       |
| S20   | 3.1362   | 395.33                         | (0.51248)H-4→L+3  | 0.0012       |
| S21   | 3.1713   | 390.96                         | (0.61937)H-6→L+3  | 0.0081       |
| S22   | 3.2649   | 379.75                         | (0.59860)H-7→L    | 0.0823       |
| S23   | 3.3127   | 374.27                         | (0.49975)H-8→L    | 0.0162       |
| S24   | 3.3487   | 370.24                         | (0.44606)H-1→L    | 0.0032       |
| S25   | 3.3774   | 367.10                         | (0.46078)H-9→L    | 0.0022       |
| S26   | 3.4538   | 358.98                         | (0.29858)H-12→L+1 | 0.0011       |
| S27   | 3.4698   | 357.33                         | (0.34513)H-3→L    | 0.0014       |
| S28   | 3.5104   | 353.19                         | (0.47164)H-12→L+2 | 0.0003       |
| S29   | 3.5246   | 351.76                         | (0.50414)H-3→L    | 0.0037       |
| S30   | 3.5378   | 350.46                         | (0.27957)H-1→L+6  | 0.0021       |

**Table S10.** Calculated transition energies and oscillator strengths for PC<sub>60</sub>BM/D3.

| State | $E$ (eV) | Absorption peak $\lambda$ (nm) | Contribution MO  | Strength $f$ |
|-------|----------|--------------------------------|------------------|--------------|
| S1    | 2.4266   | 510.94                         | (0.67128)H-2→L   | 0.0015       |
| S2    | 2.4547   | 505.10                         | (0.61468)H-2→L+1 | 0.0000       |
| S3    | 2.5250   | 491.02                         | (0.61561)H-3→L   | 0.0000       |
| S4    | 2.5474   | 486.70                         | (0.60835)H-4→L   | 0.0000       |
| S5    | 2.6733   | 463.80                         | (0.48331)H-5→L+1 | 0.0002       |
| S6    | 2.7219   | 455.51                         | (0.43218)H-3→L+1 | 0.0005       |
| S7    | 2.7815   | 445.75                         | (0.48935)H-5→L   | 0.0001       |
| S8    | 2.8316   | 437.87                         | (0.43023)H-5→L+1 | 0.0001       |
| S9    | 2.8664   | 432.55                         | (0.49970)H-7→L+1 | 0.0007       |
| S10   | 2.9463   | 420.82                         | (0.56201)H-5→L+2 | 0.0010       |
| S11   | 2.9788   | 416.22                         | (0.55634)H-2→L+2 | 0.0028       |
| S12   | 2.9961   | 413.82                         | (0.42700)H-3→L+2 | 0.0003       |
| S13   | 3.0944   | 400.68                         | (0.61905)H-7→L   | 0.0062       |
| S14   | 3.1214   | 397.21                         | (0.62427)H→L+3   | 0.1555       |
| S15   | 3.1358   | 395.39                         | (0.43619)H-4→L+2 | 0.0164       |
| S16   | 3.1716   | 390.92                         | (0.58793)H-7→L+2 | 0.0396       |
| S17   | 3.2027   | 387.12                         | (0.57249)H-1→L+3 | 0.3206       |
| S18   | 3.2705   | 379.10                         | (0.44927)H→L+1   | 0.0118       |
| S19   | 3.3116   | 374.39                         | (0.38158)H→L     | 0.0049       |
| S20   | 3.3784   | 366.99                         | (0.47808)H-1→L   | 0.0046       |
| S21   | 3.3965   | 365.03                         | (0.47019)H-1→L+1 | 0.0029       |
| S22   | 3.4576   | 358.59                         | (0.48857)H→L+2   | 0.0040       |
| S23   | 3.4619   | 358.14                         | (0.39831)H→L+2   | 0.0007       |
| S24   | 3.5138   | 352.84                         | (0.41949)H-2→L+5 | 0.0001       |
| S25   | 3.5327   | 350.97                         | (0.29286)H-5→L+4 | 0.0021       |
| S26   | 3.5727   | 347.03                         | (0.60880)H-1→L+2 | 0.0013       |
| S27   | 3.6875   | 336.23                         | (0.43782)H-6→L+3 | 0.0181       |
| S28   | 3.6955   | 335.50                         | (0.39163)H-23→L  | 0.0012       |
| S29   | 3.7085   | 334.32                         | (0.37389)H-24→L  | 0.0004       |
| S30   | 3.7143   | 333.80                         | (0.46911)H-2→L+4 | 0.0032       |

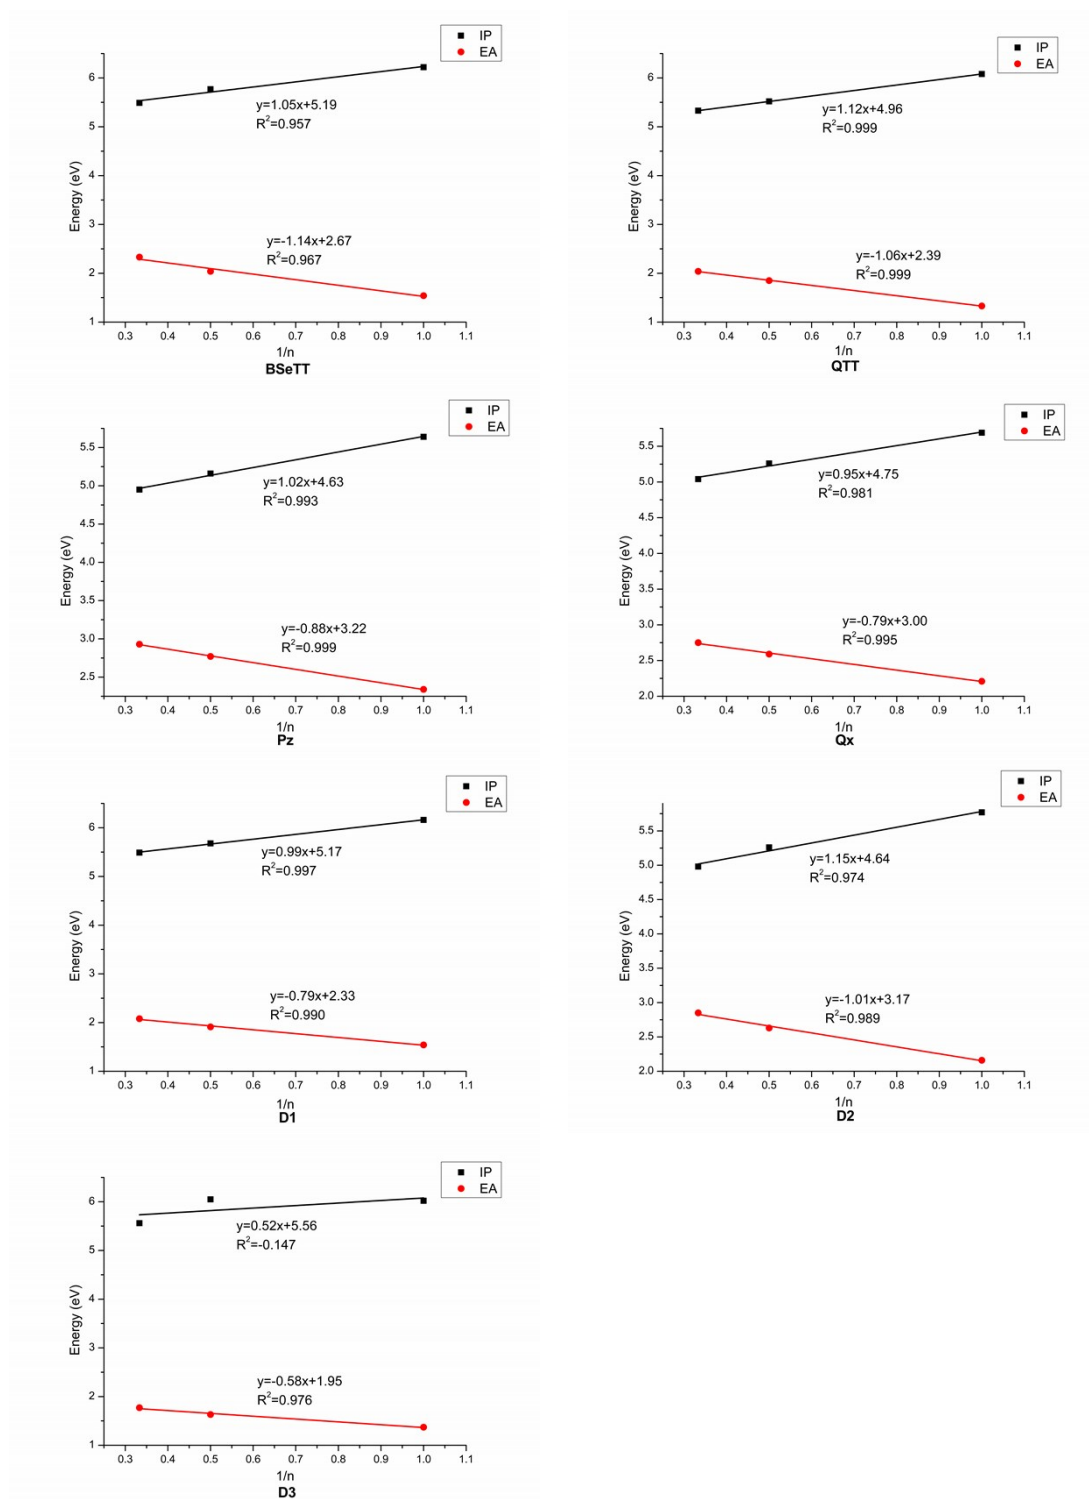

**Figure S1.** Relationship between the ionization potentials and electron affinities of all oligomers and the reciprocal of conjugated unit ( $1/n$ ).

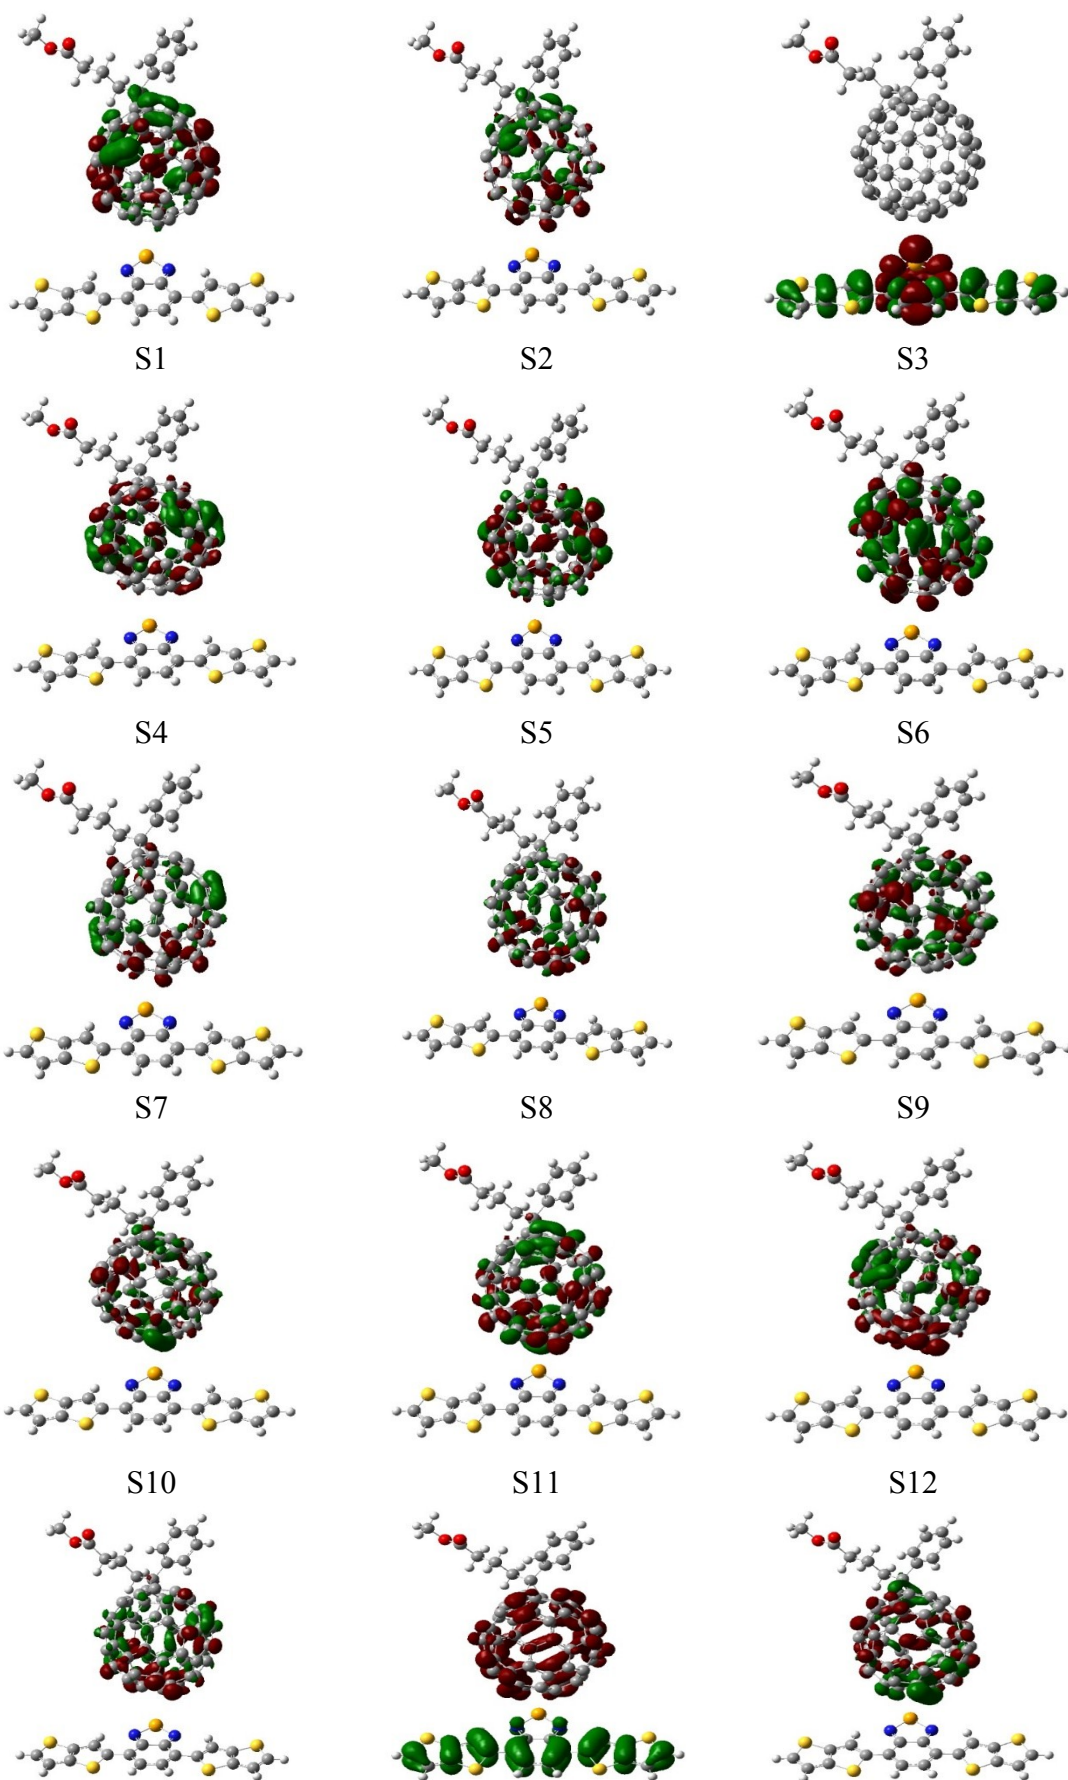





S28

S29

S30

**Figure S2.** Charge difference density (CDD) of PC<sub>60</sub>BM/BSeTT, where the green and red stand for the hole and electron, respectively.

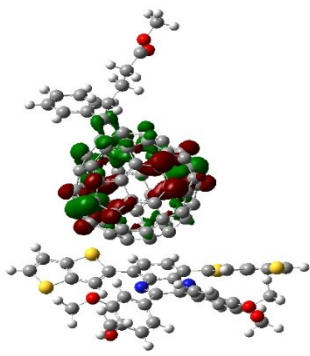

S1

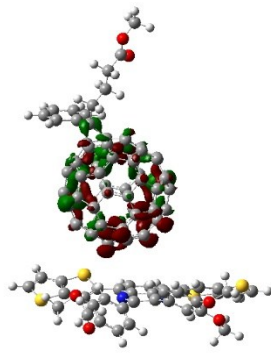

S2

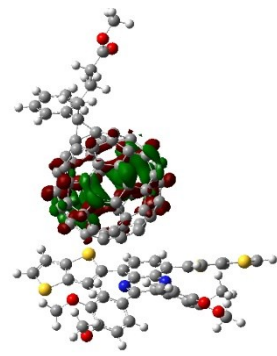

S3

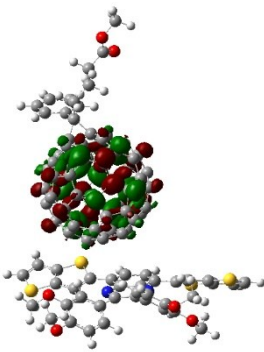

S4

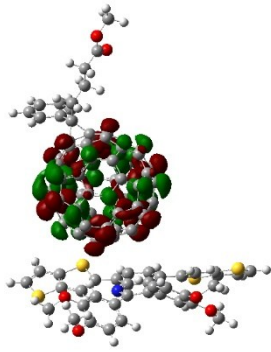

S5

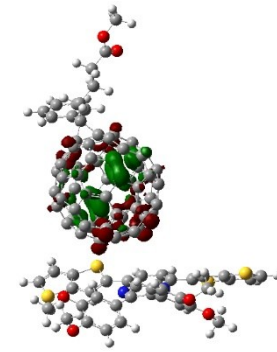

S6

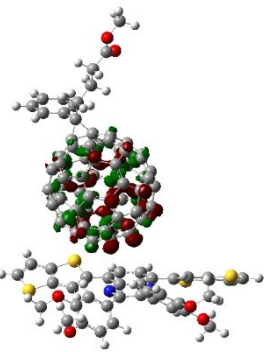

S7

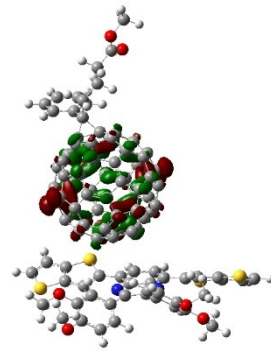

S8

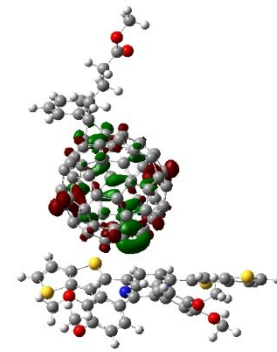

S9

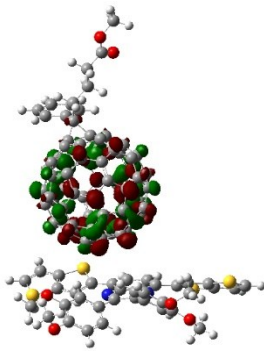

S10

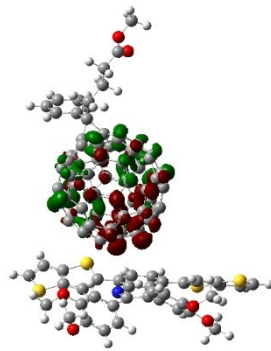

S11

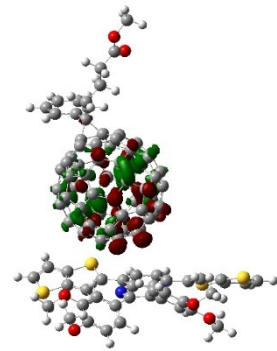

S12

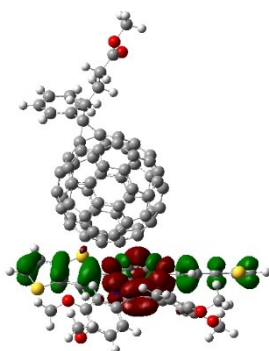

S13

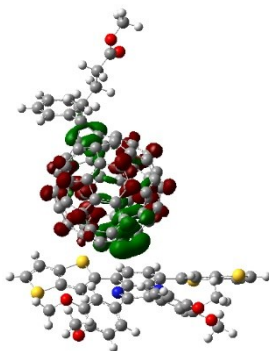

S14

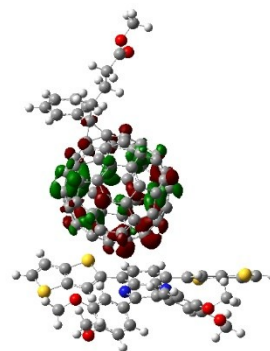

S15

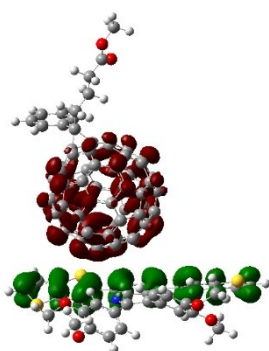

S16

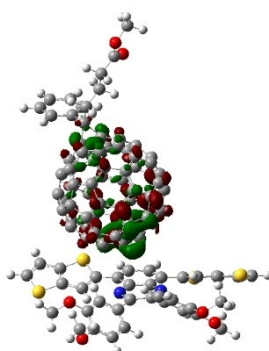

S17

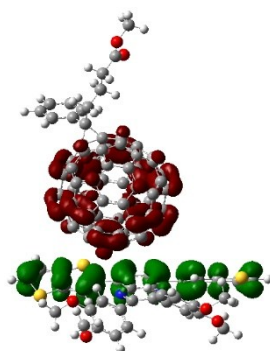

S18

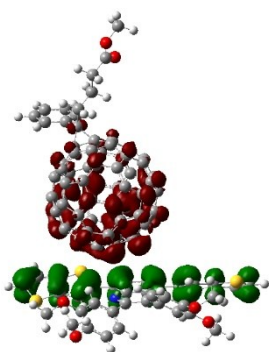

S19

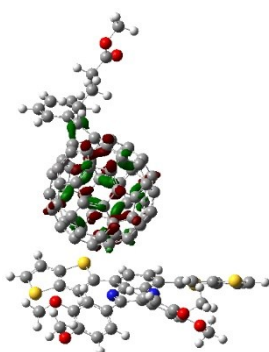

S20

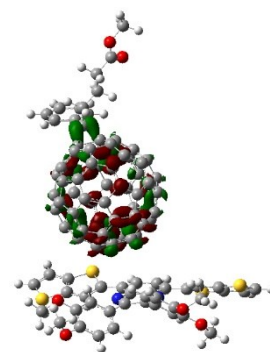

S21

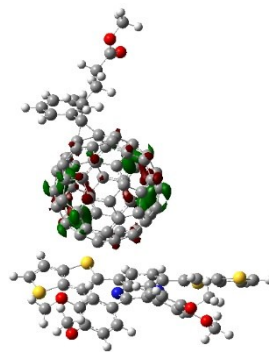

S22

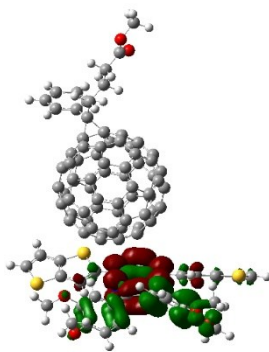

S23

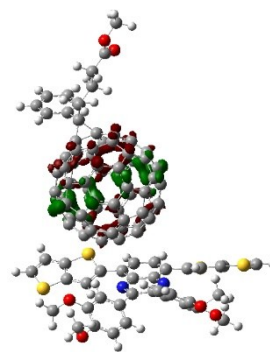

S24

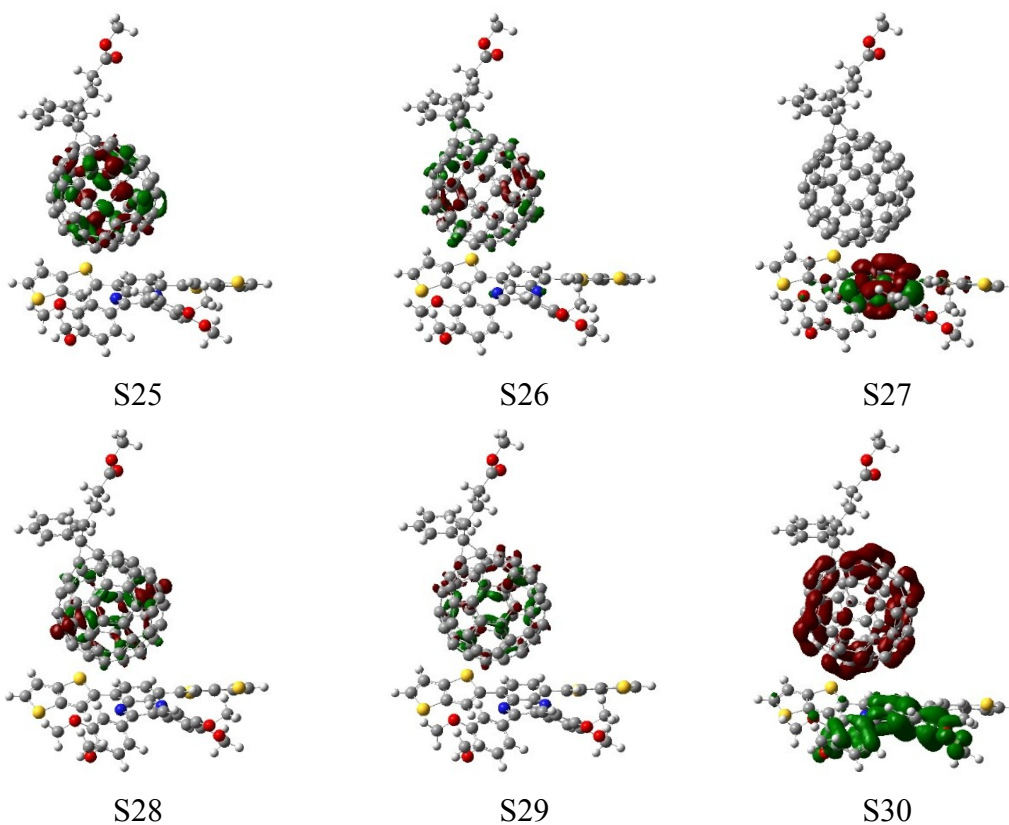

**Figure S3.** Charge difference density (CDD) of PC<sub>60</sub>BM/QTT, where the green and red stand for the hole and electron, respectively.



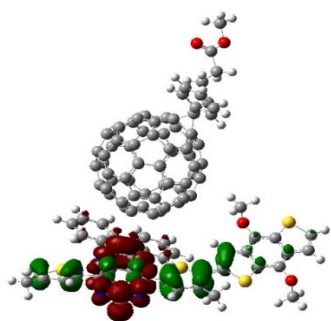

S1

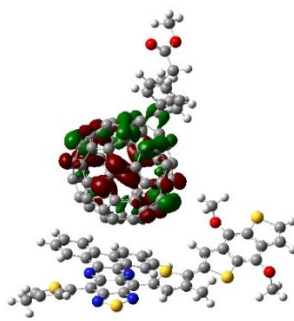

S2

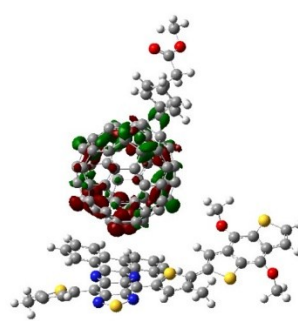

S3

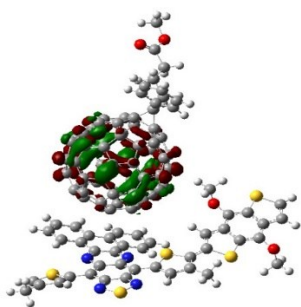

S4

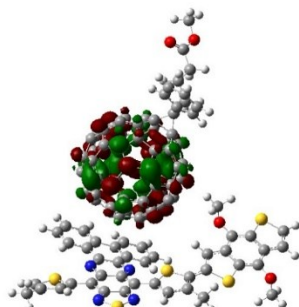

S5

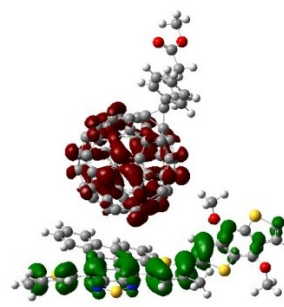

S6

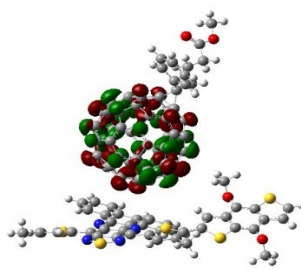

S7

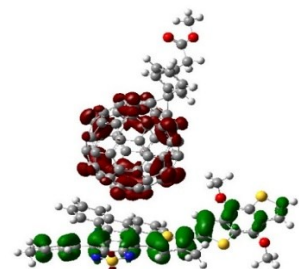

S8

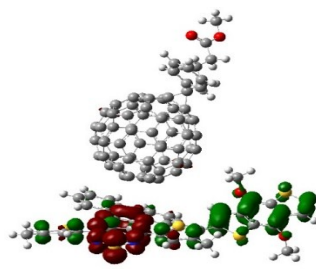

S9

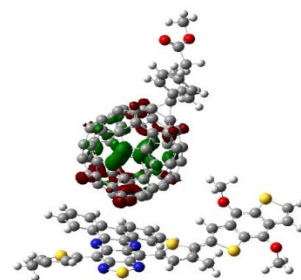

S10

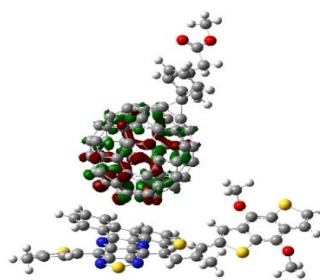

S11

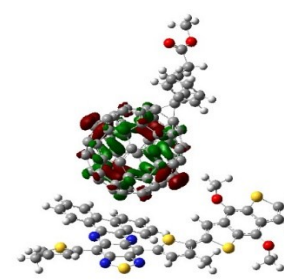

S12

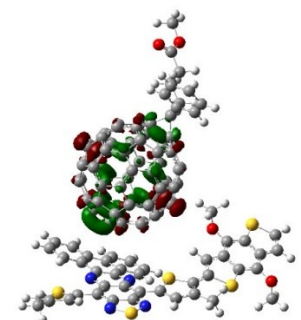

S13

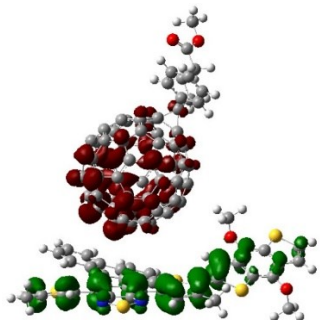

S14

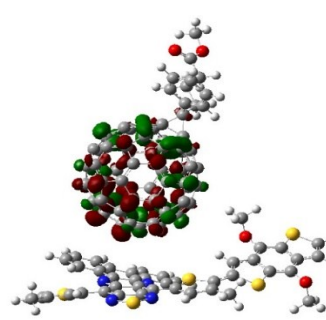

S15

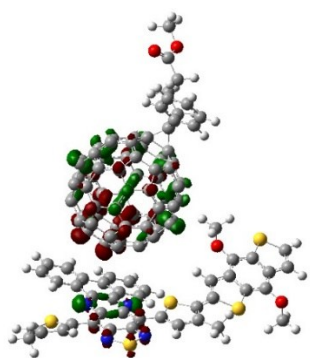

S16

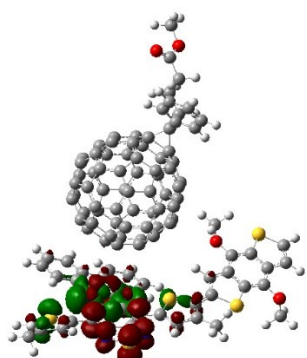

S17

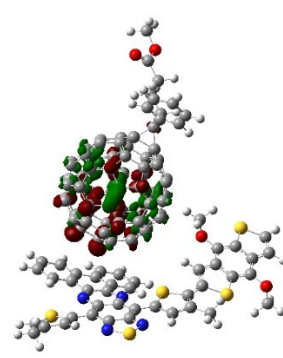

S18

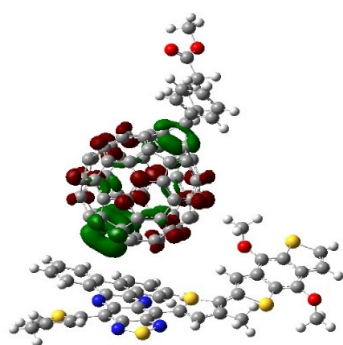

S19

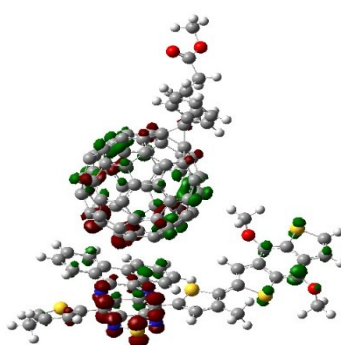

S20

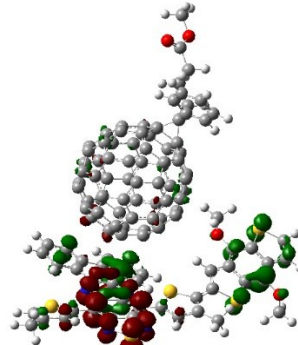

S21

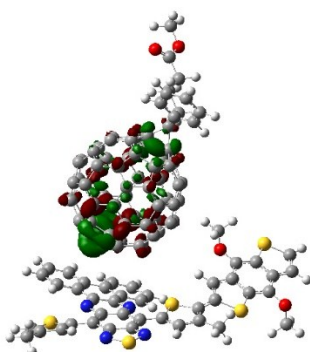

S22

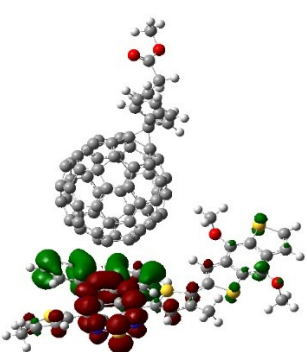

S23

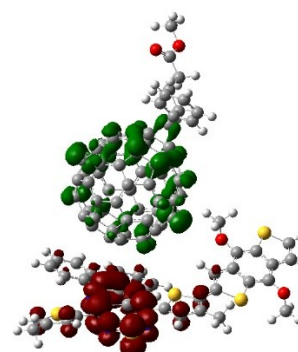

S24

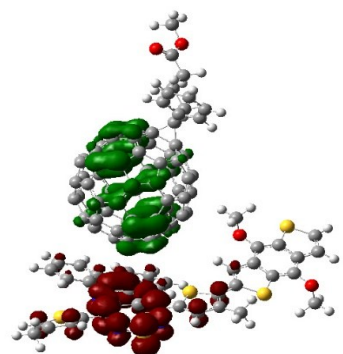

S25

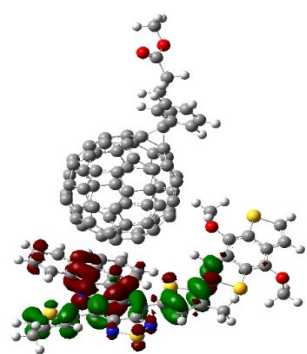

S26

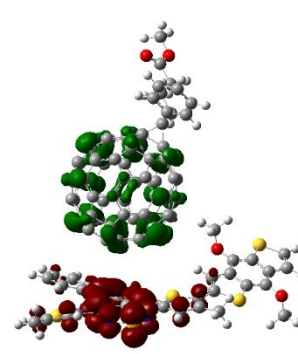

S27

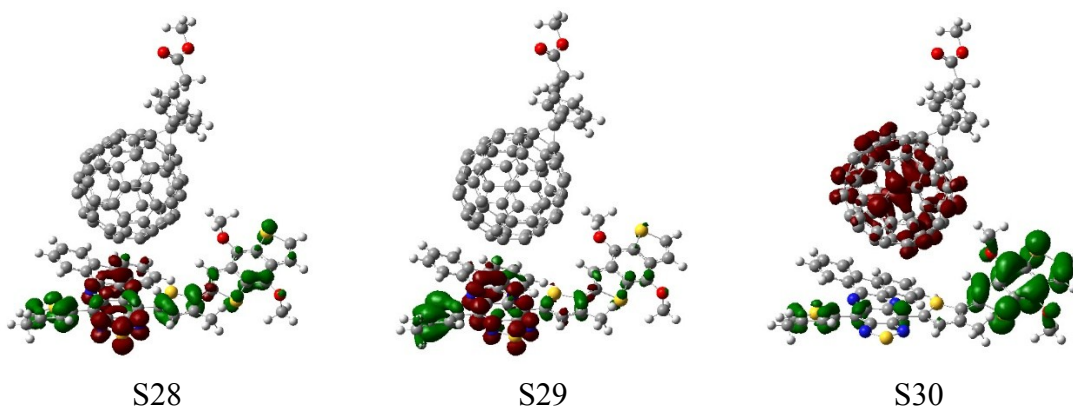

**Figure S4.** Charge difference density (CDD) of PC<sub>60</sub>BM/Pz, where the green and red stand for the hole and electron, respectively.



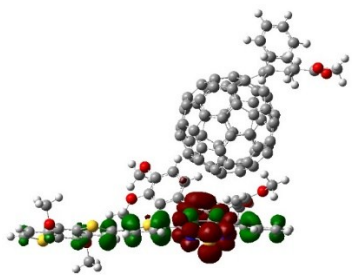

S1

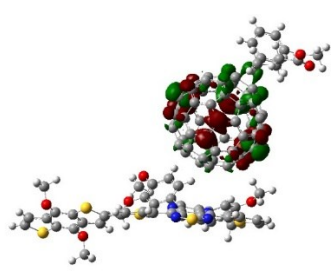

S2

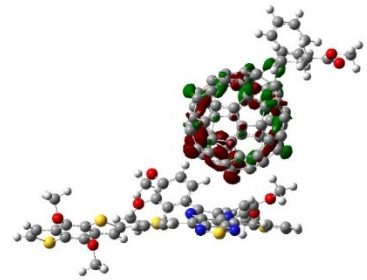

S3

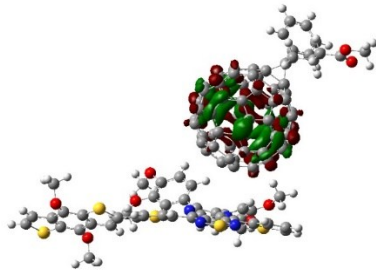

S4

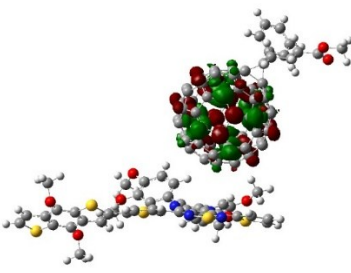

S5

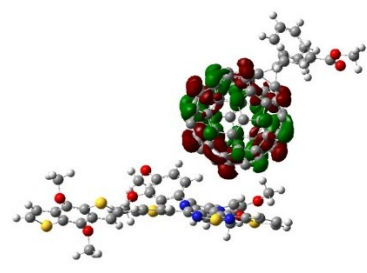

S6

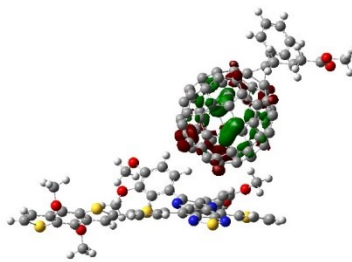

S7

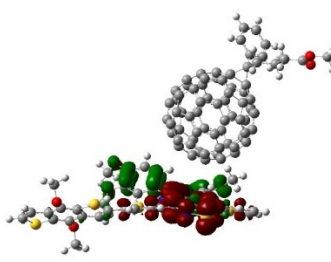

S8

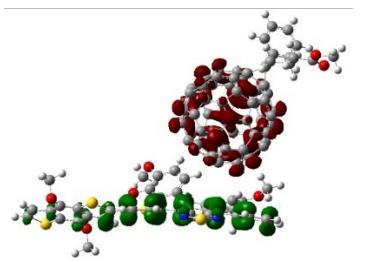

S9

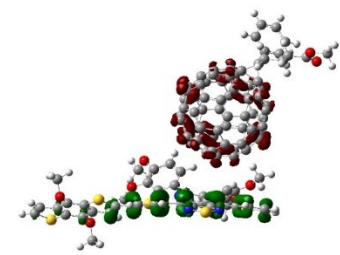

S10

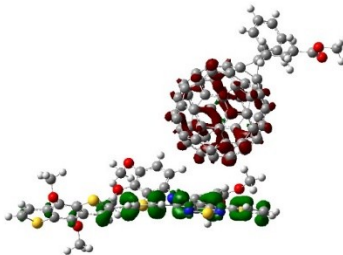

S11

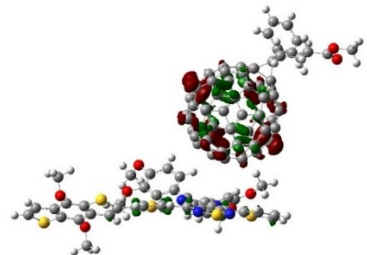

S12

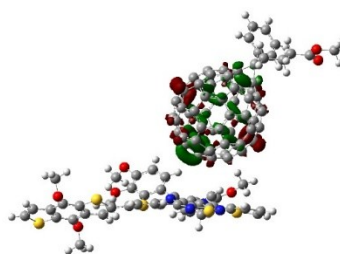

S13

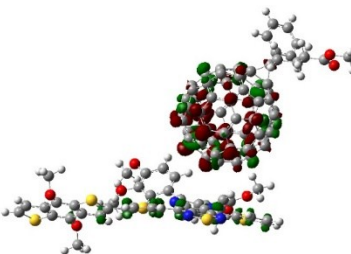

S14

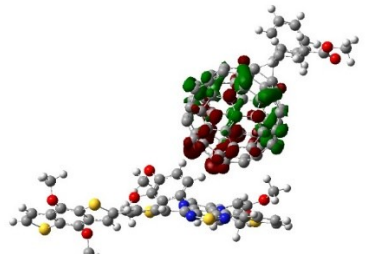

S15

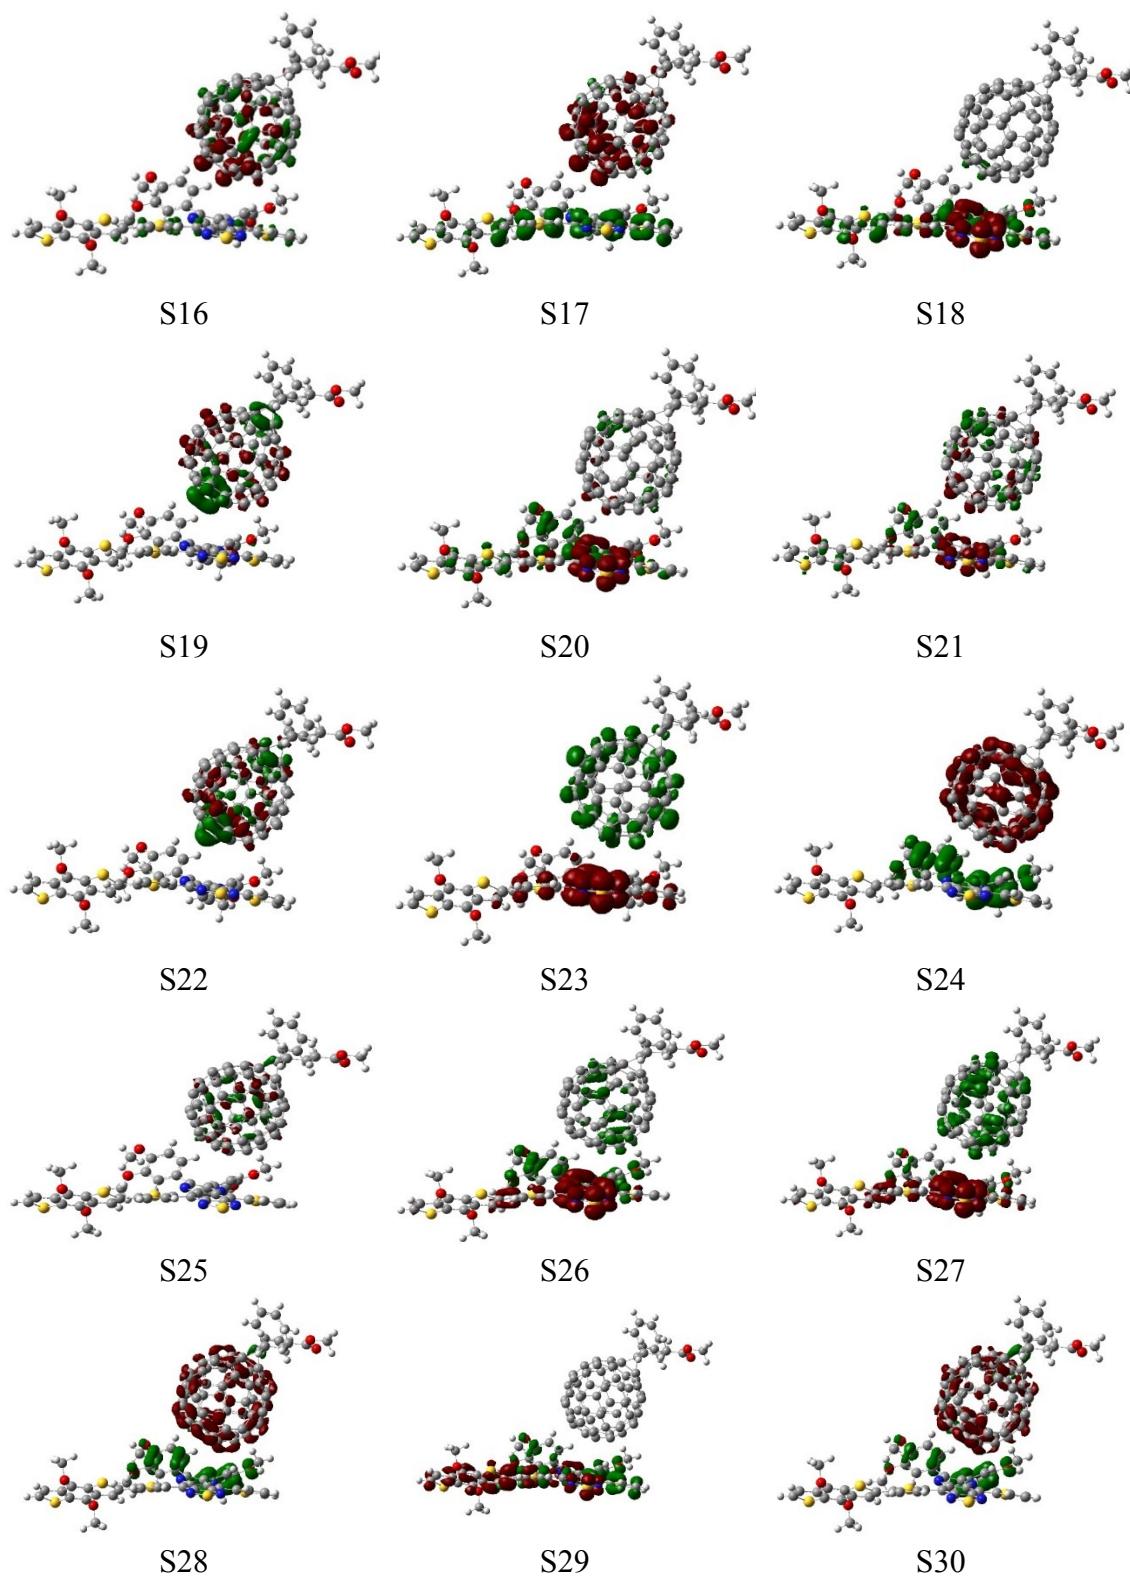

**Figure S5.** Charge difference density (CDD) of PC<sub>60</sub>BM/Qx, where the green and red stand for the hole and electron, respectively.

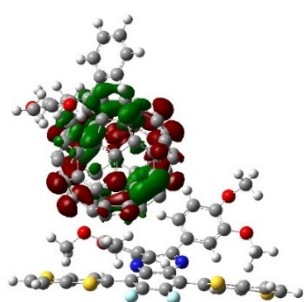

S1

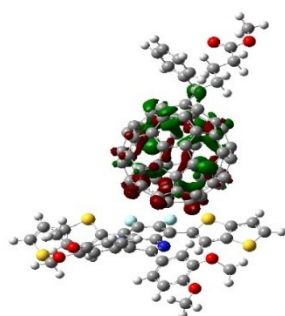

S2

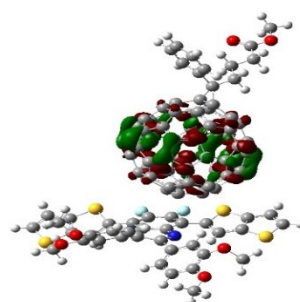

S3

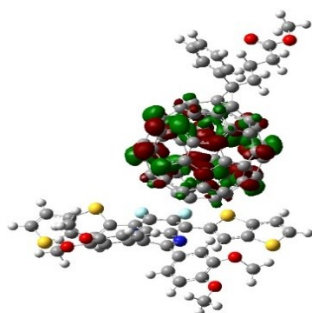

S4

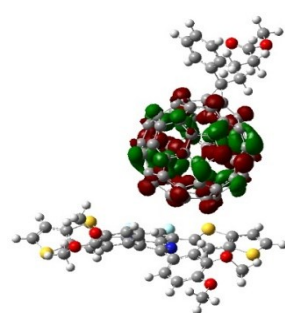

S5

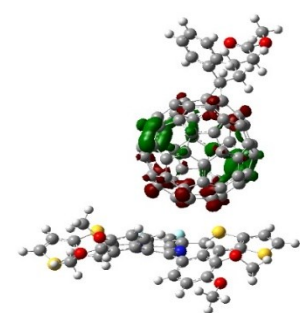

S6

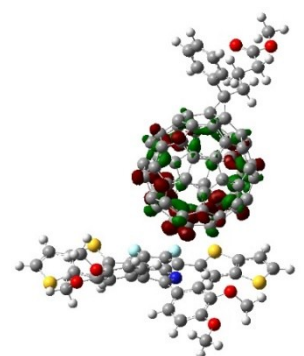

S7

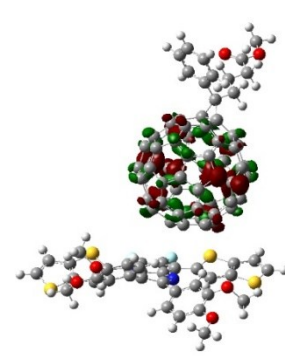

S8

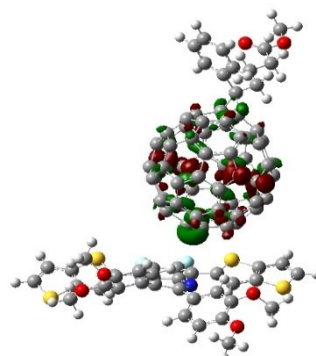

S9

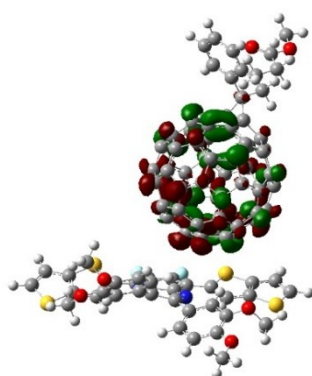

S10

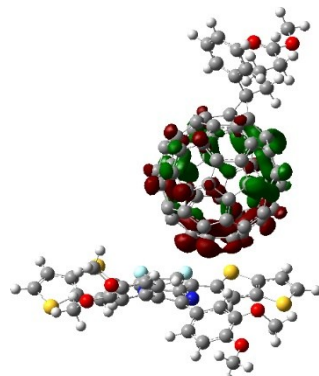

S11

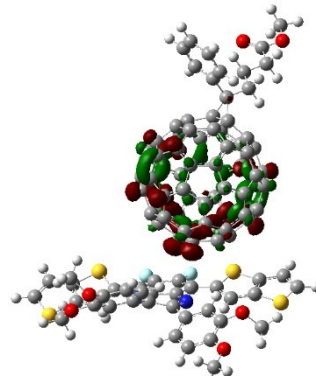

S12



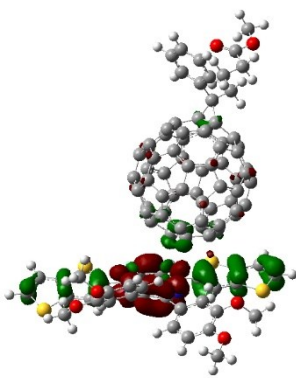

S13

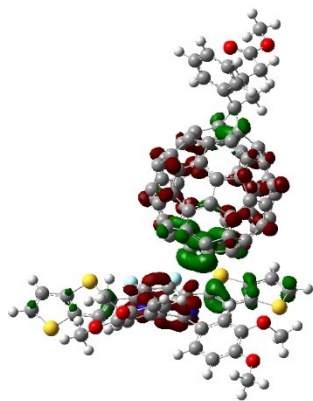

S14

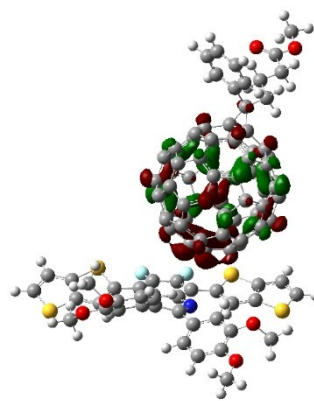

S15

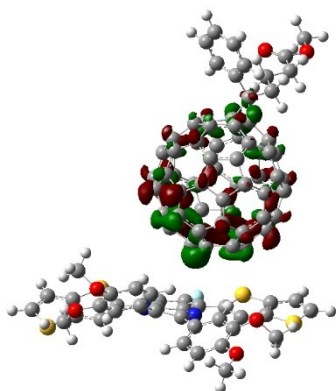

S16

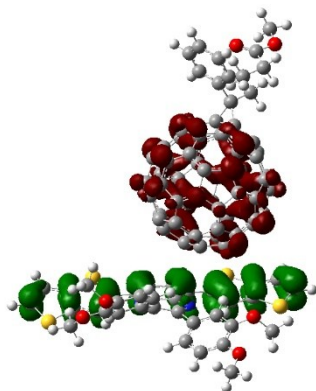

S17

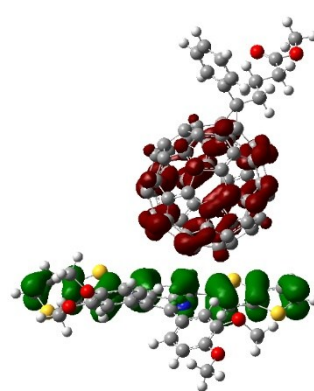

S18

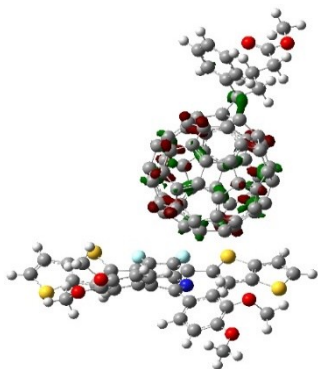

S19

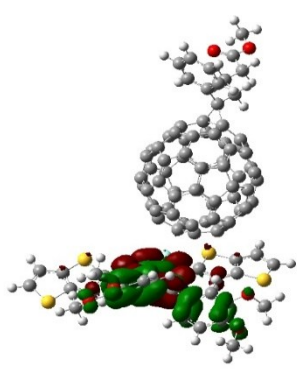

S20

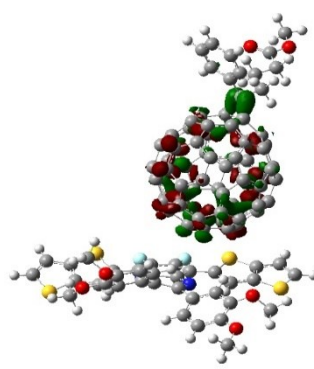

S21

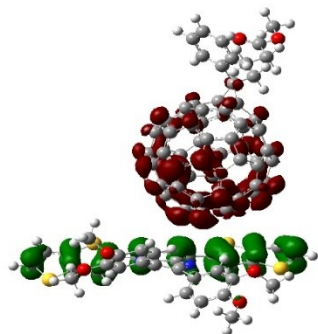

S22

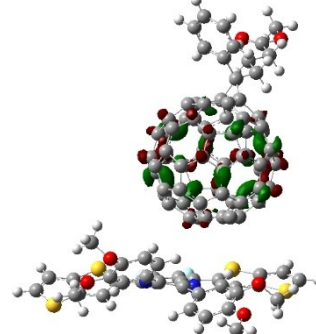

S23

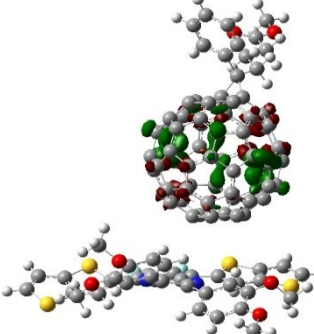

S24

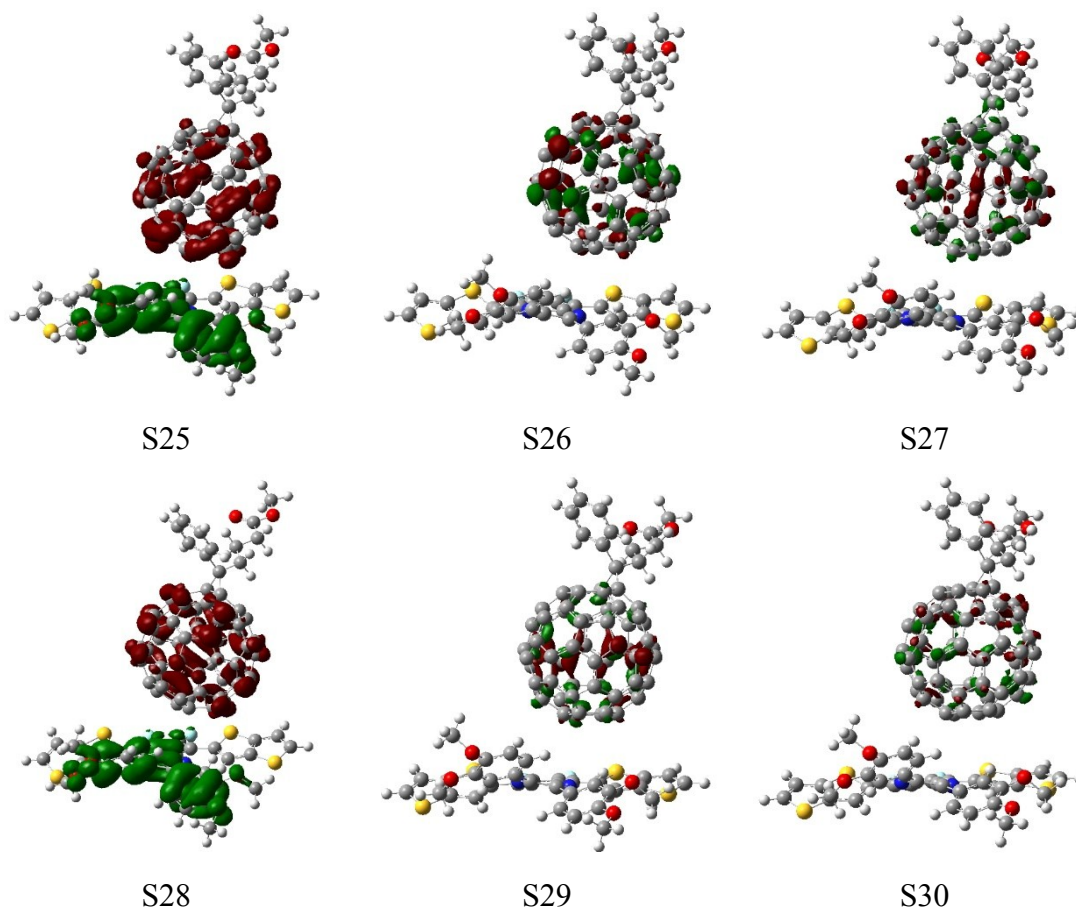

**Figure S6.** Charge difference density (CDD) of PC<sub>60</sub>BM/D1, where the green and red stand for the hole and electron, respectively.

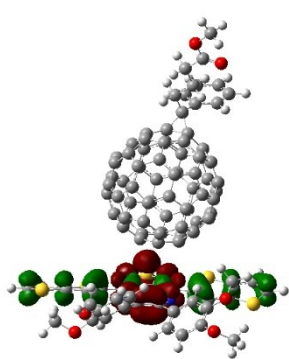

S1

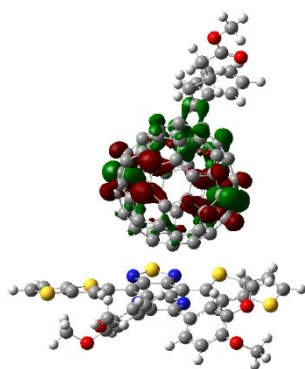

S2

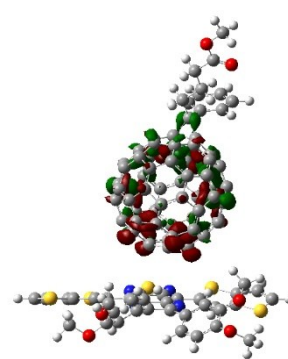

S3

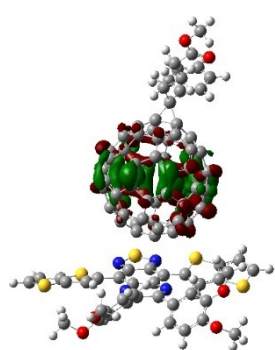

S4

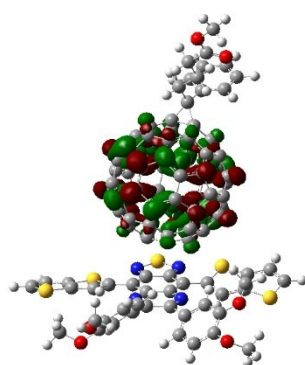

S5

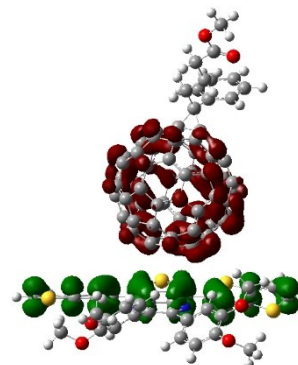

S6

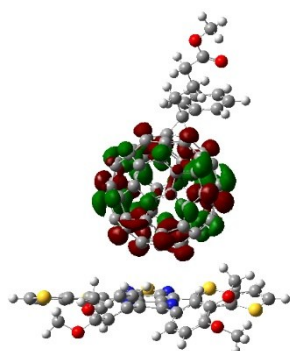

S7

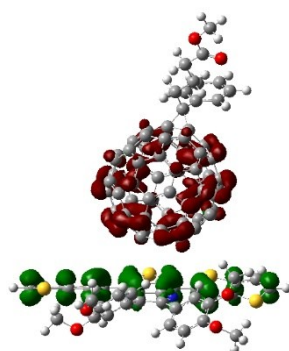

S8

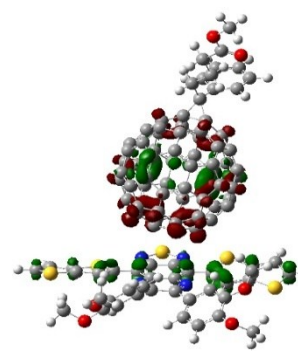

S9

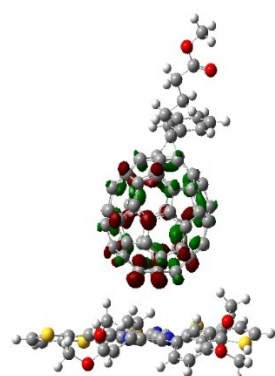

S10

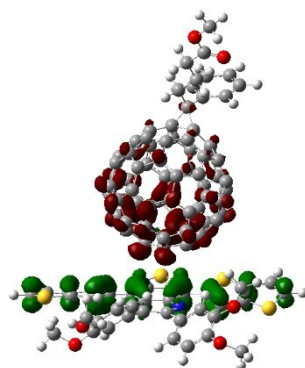

S11

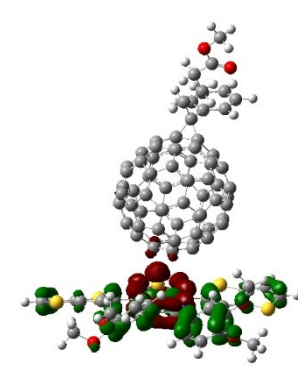

S12

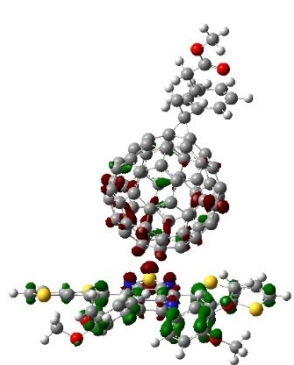

S13

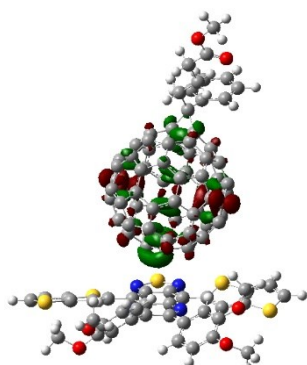

S14

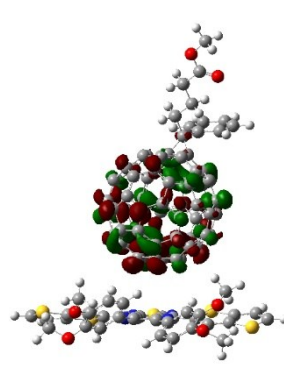

S15

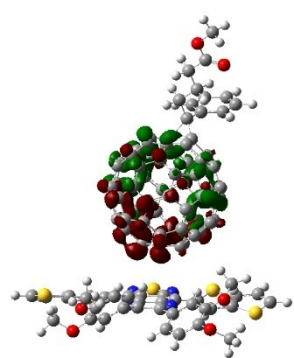

S16

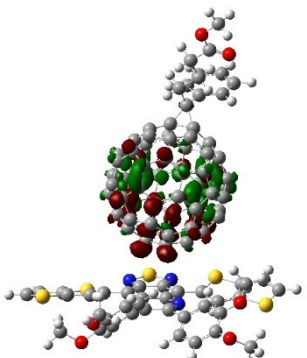

S17

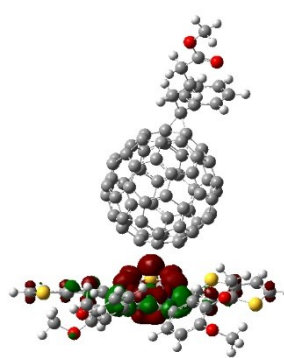

S18

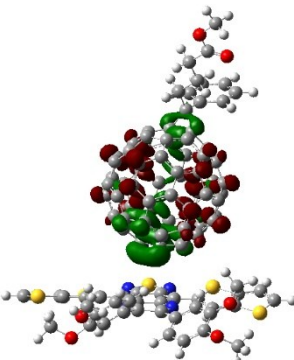

S19

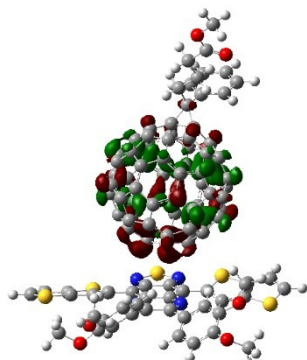

S20

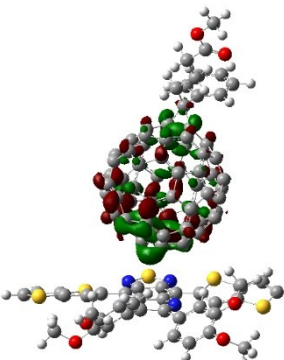

S21

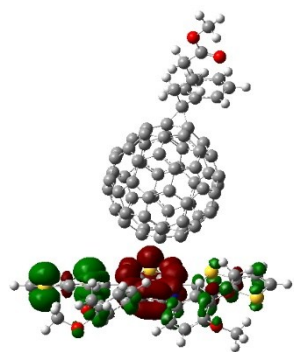

S22

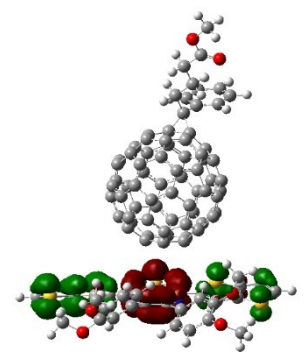

S23

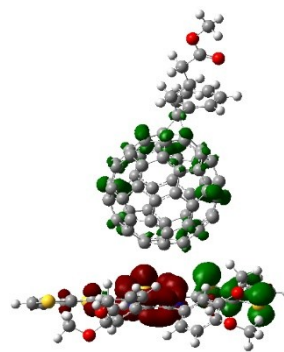

S24



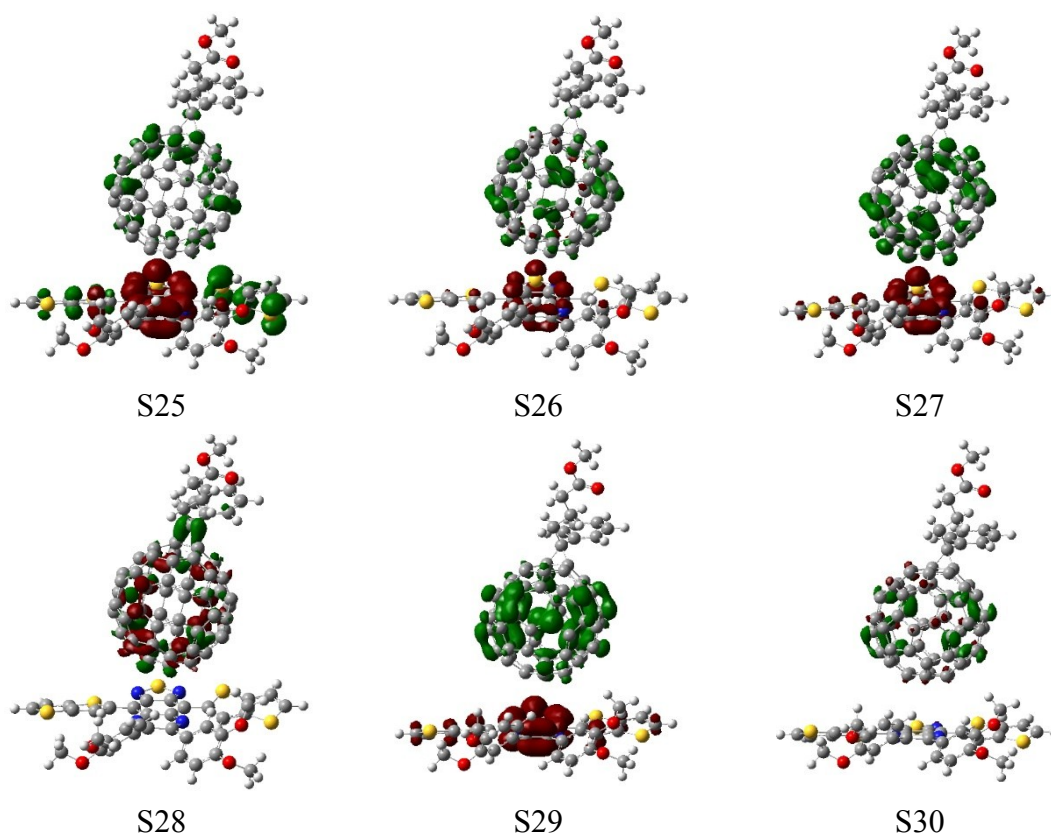

**Figure S7.** Charge difference density (CDD) of PC<sub>60</sub>BM/D2, where the green and red stand for the hole and electron, respectively.



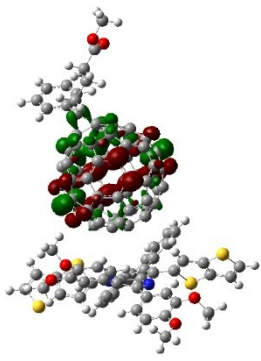

S1

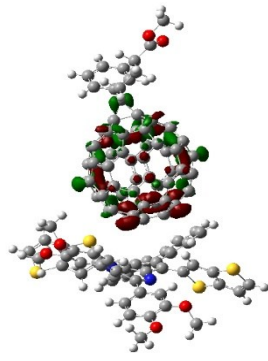

S2

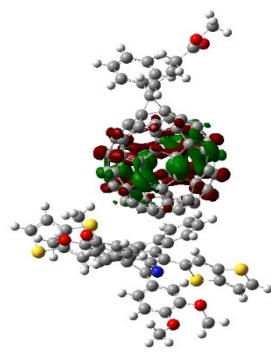

S3

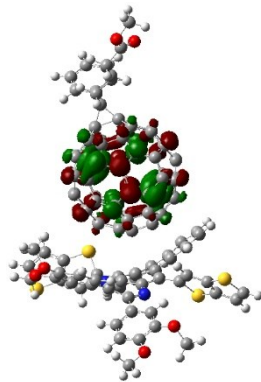

S4

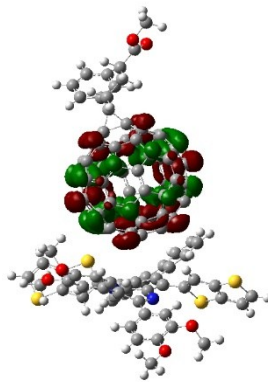

S5

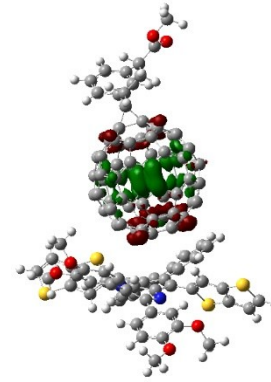

S6

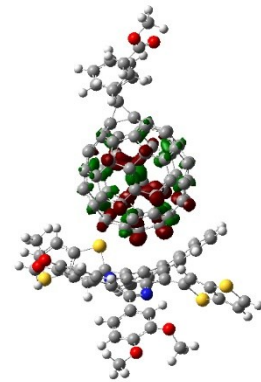

S7

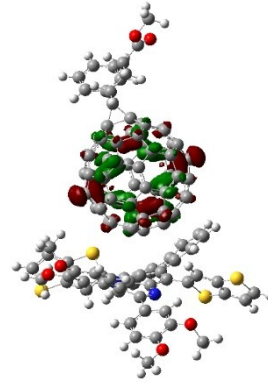

S8

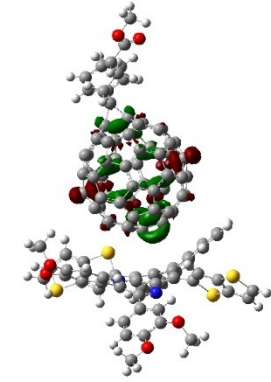

S9

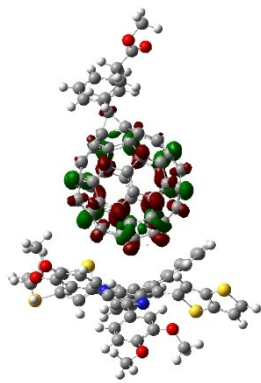

S10

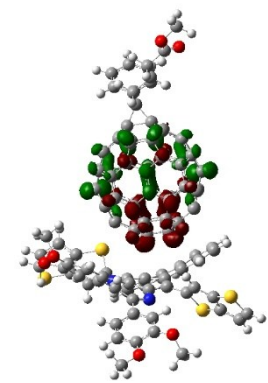

S11

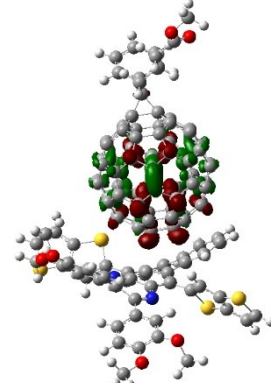

S12

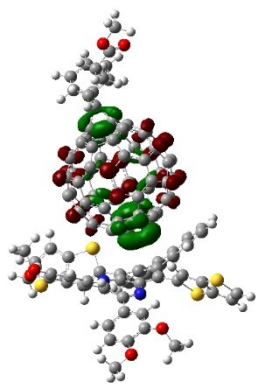

S13

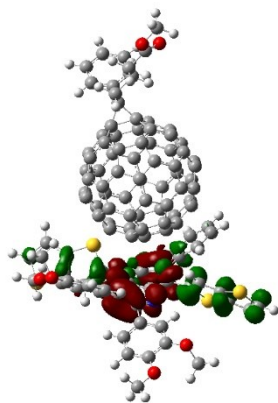

S14

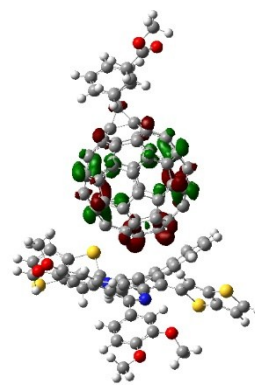

S15

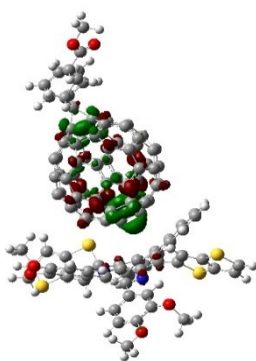

S16

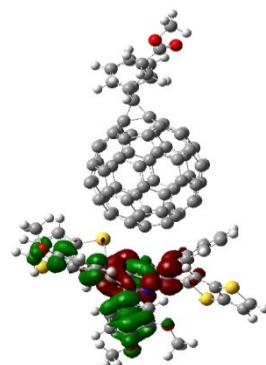

S17

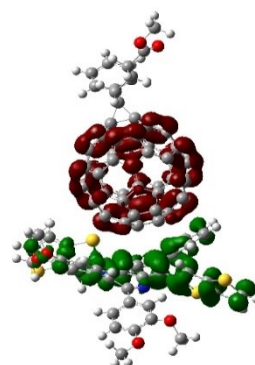

S18

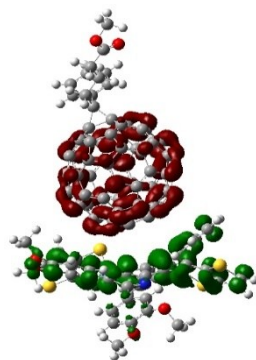

S19

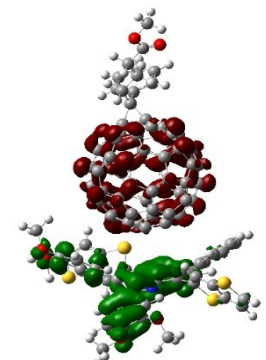

S20

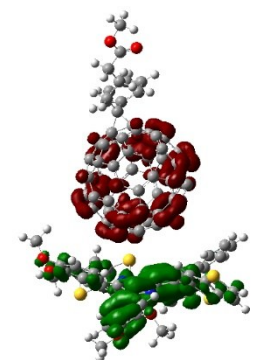

S21

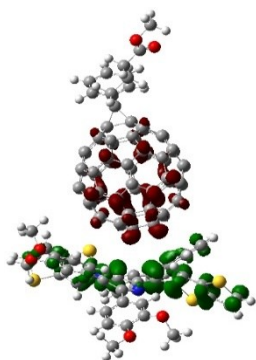

S22

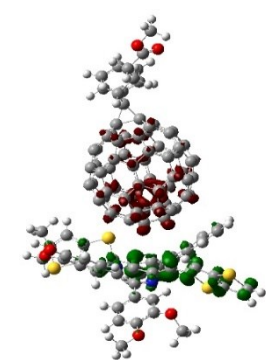

S23

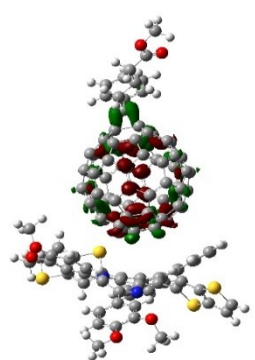

S24

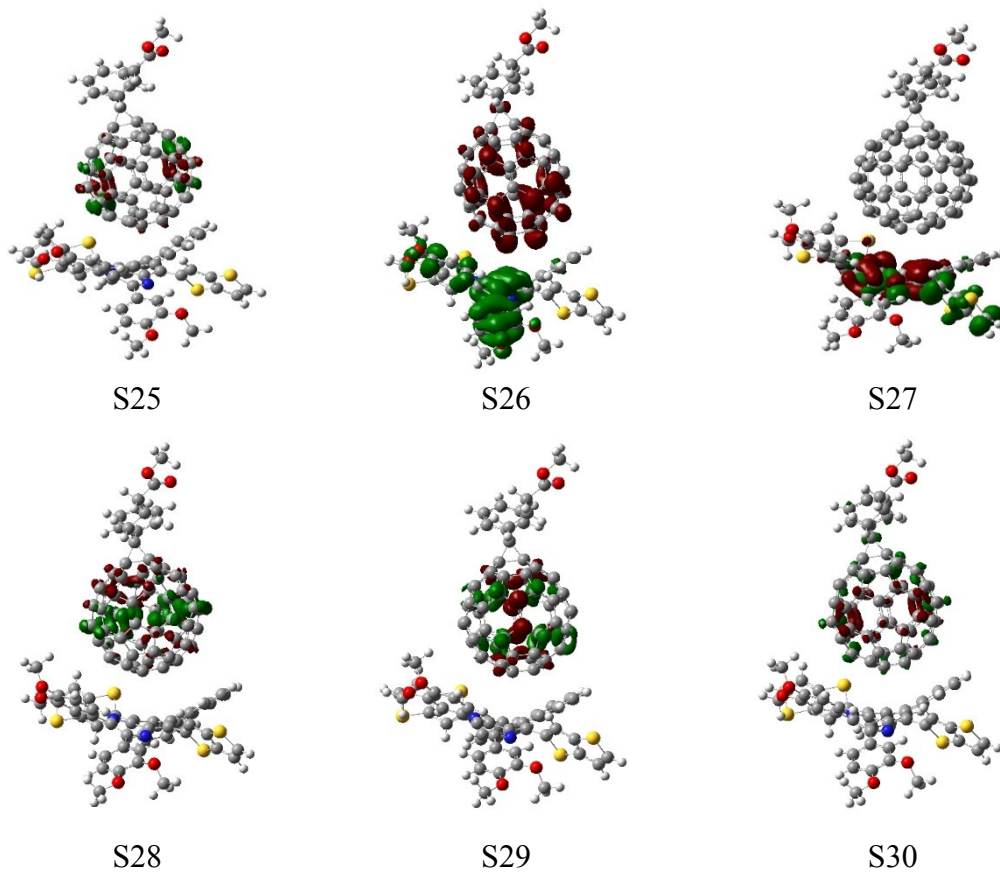

**Figure S8.** Charge difference density (CDD) of PC<sub>60</sub>BM/D3, where the green and red stand for the hole and electron, respectively.
